# Supplementary material for: A Modified Murine Embryonic Stem Cell Test for Evaluating the Teratogenic Effects of Drugs on Early Embryogenesis
Source: PubMed Central journal article supplement (PMC4686177; doi:10.1371/journal.pone.0145286), 2015-12-18
Supplement: pone.0145286.s001.pdf [file pone.0145286.s001.pdf]

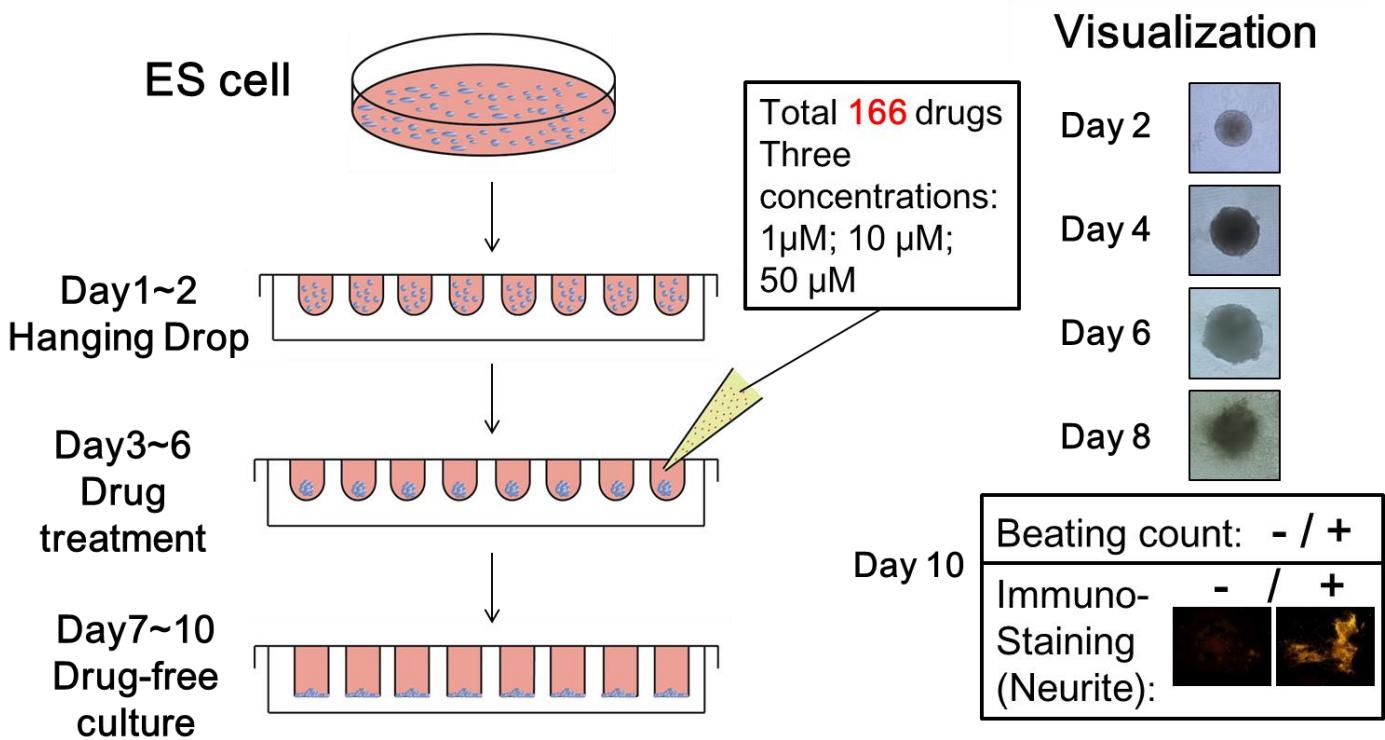

**Figure S1**  
Screening of FDA pregnancy category D and X drugs

Mouse ES cells were plated in U-type 98 well plates and EBs were allowed to form. After 2 days in culture, EBs were treated with 3 concentrations of each FDA pregnancy Cat.D or Cat.X drug until day 6. Treated EBs were transferred to flat bottom 98 well plates and cultured until day 10 without drugs. Photographs of EBs under a light microscope were taken on days 4, 6 and 8. On day 10, EBs were visually evaluated for cardiomyocyte beating and immunostained to detect neurites.

# Class I

## BOSENTAN

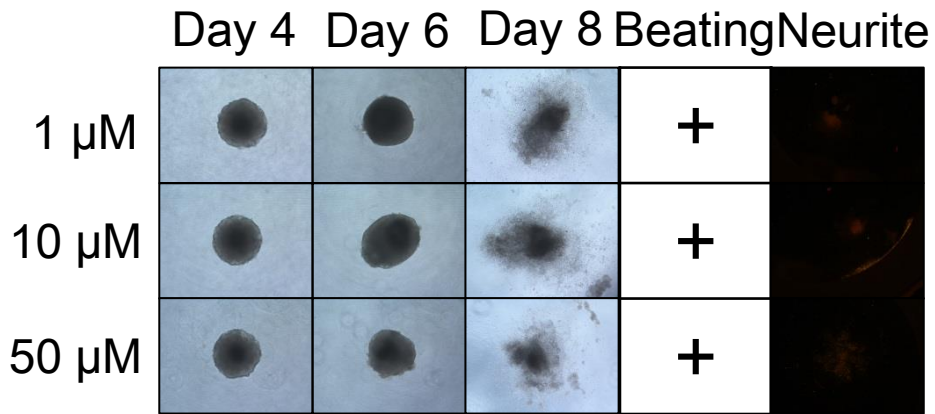

## SODIUM IODIDE

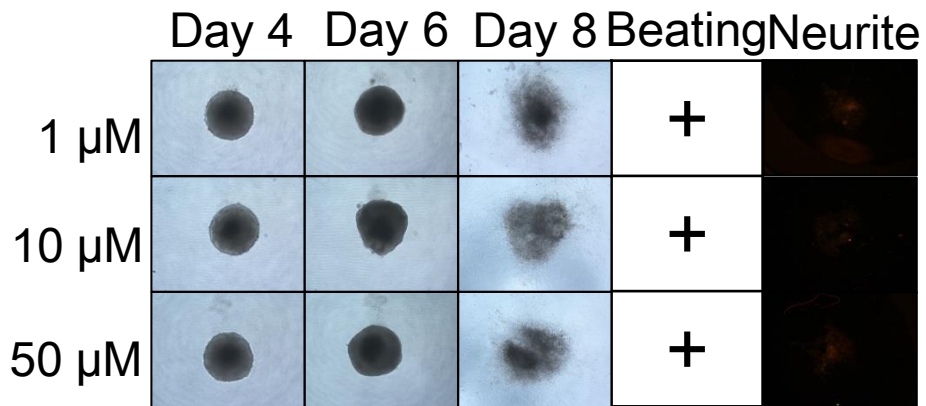

## METHYLTESTOSTERONE

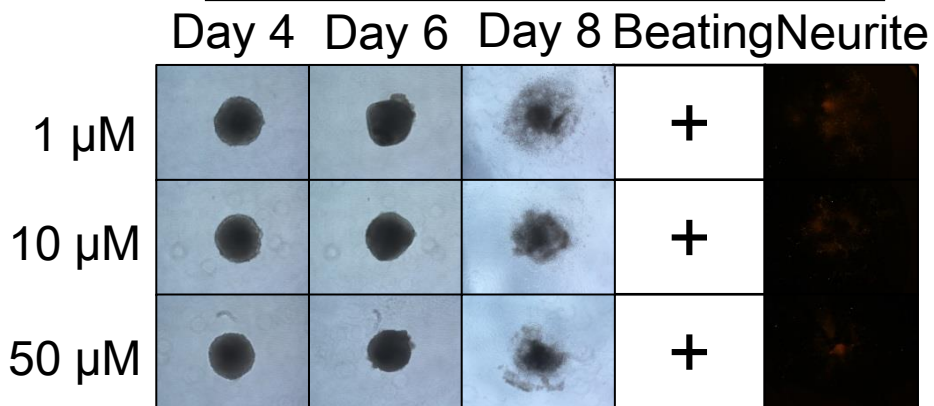

## STANOZOLOL

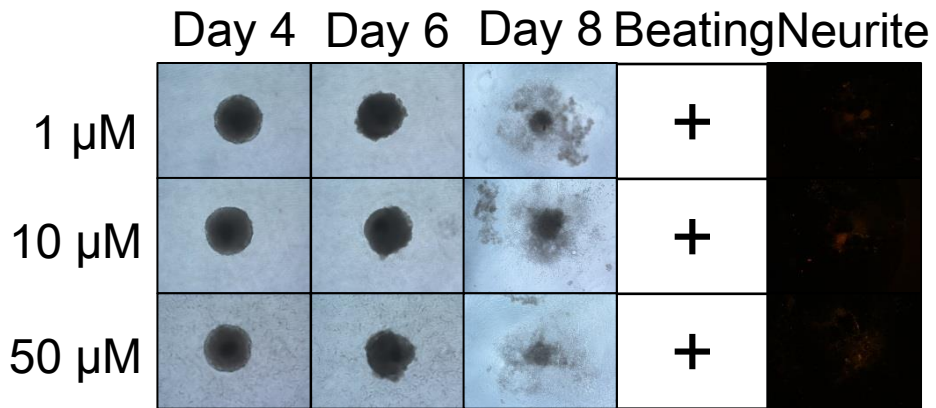

## LEUPRORELIN

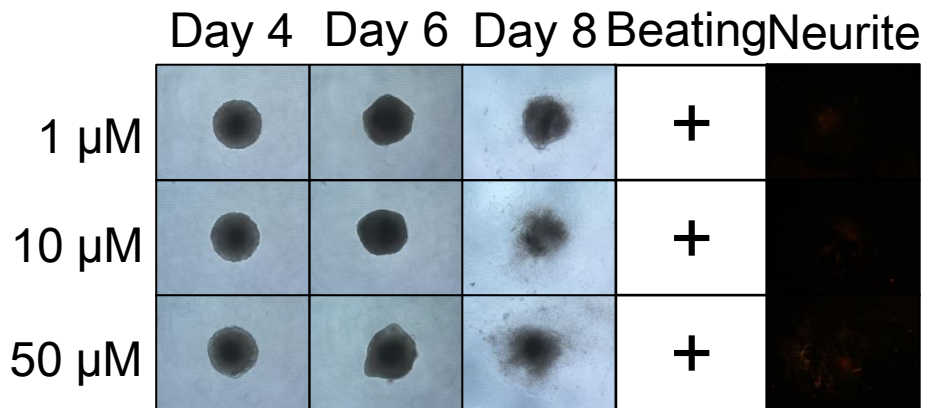

## RIBAVIRIN

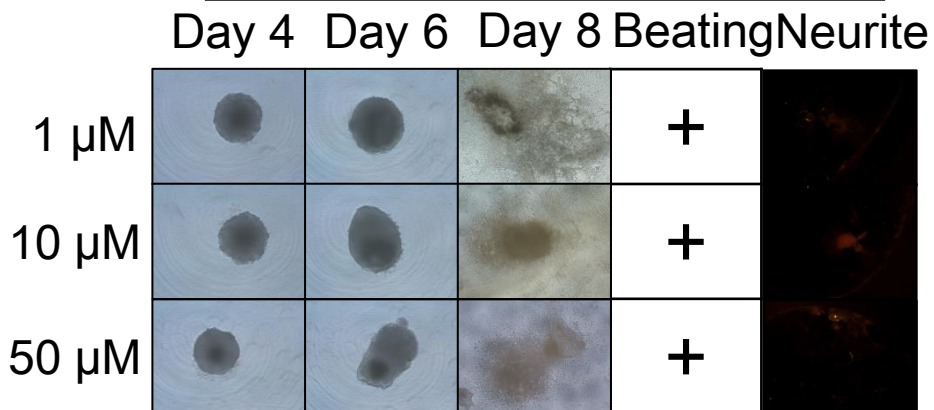

## MIGLUSTAT

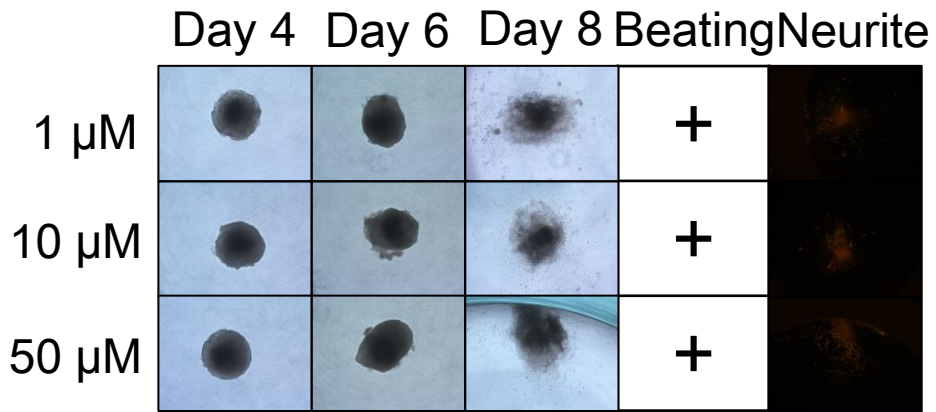

## OXYTOCIN

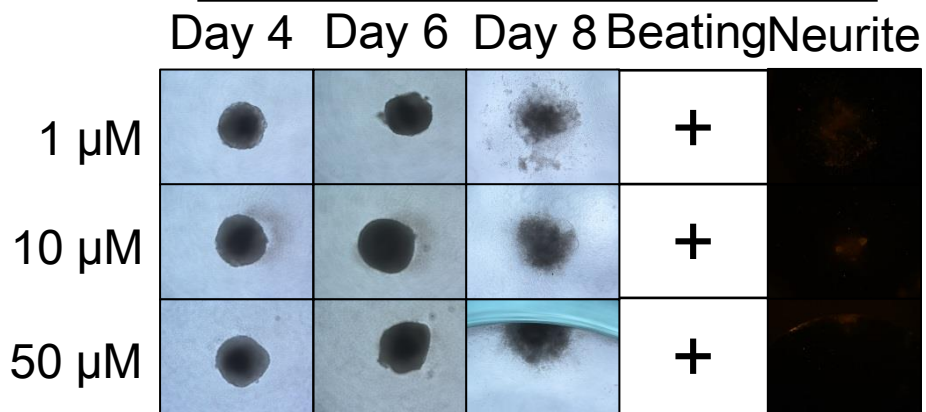

## GOSERELIN

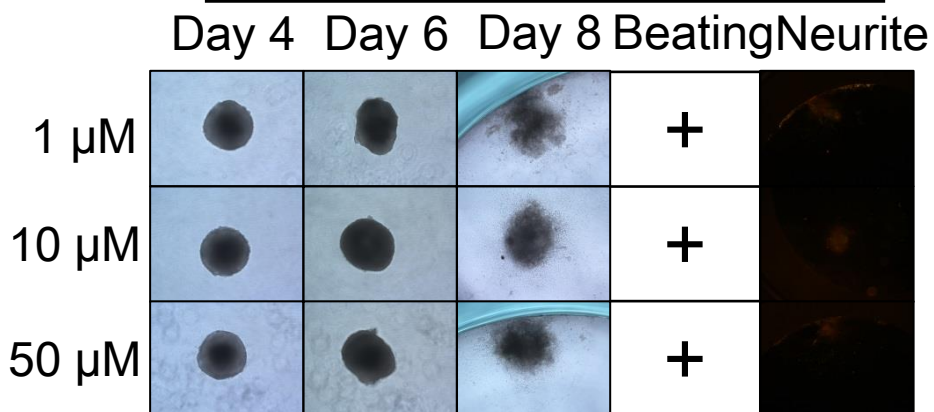

## HISTRELIN

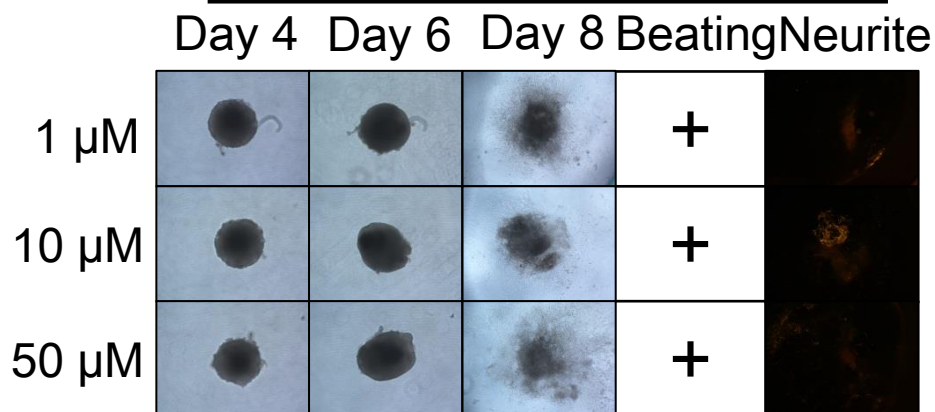

## TRIPTORELIN

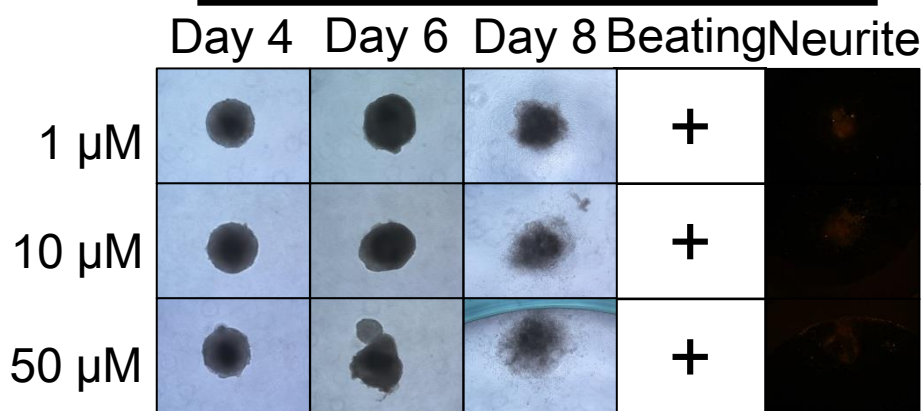

## NANDROLONE

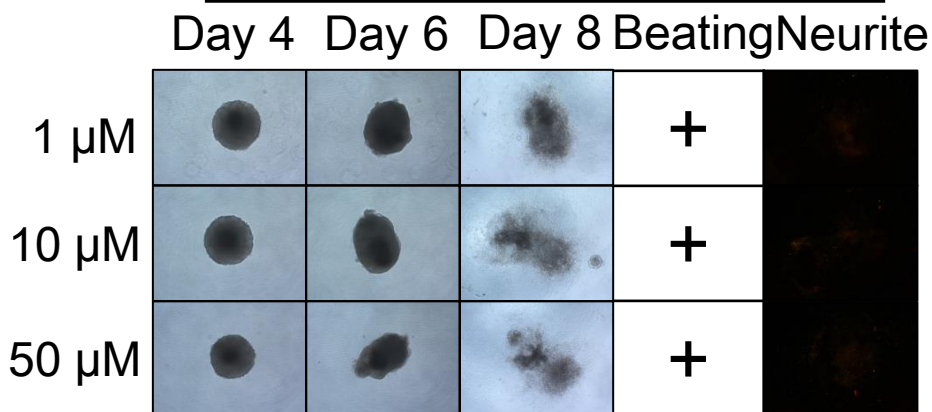

## MISOPROSTOL

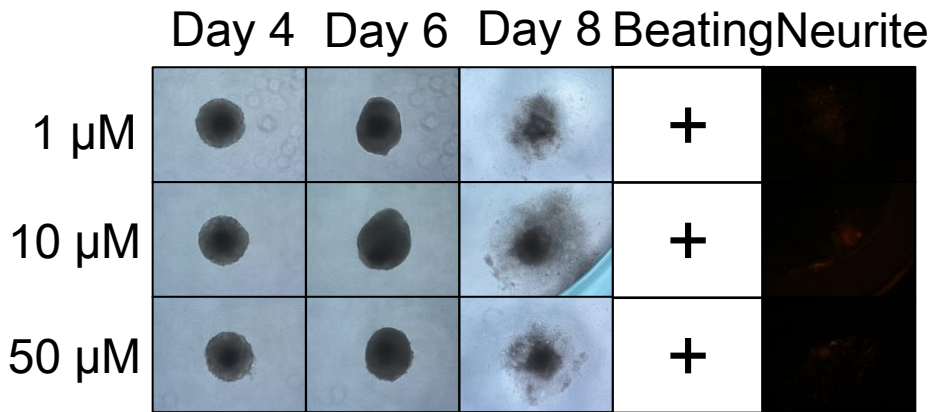

## GANIRELIX

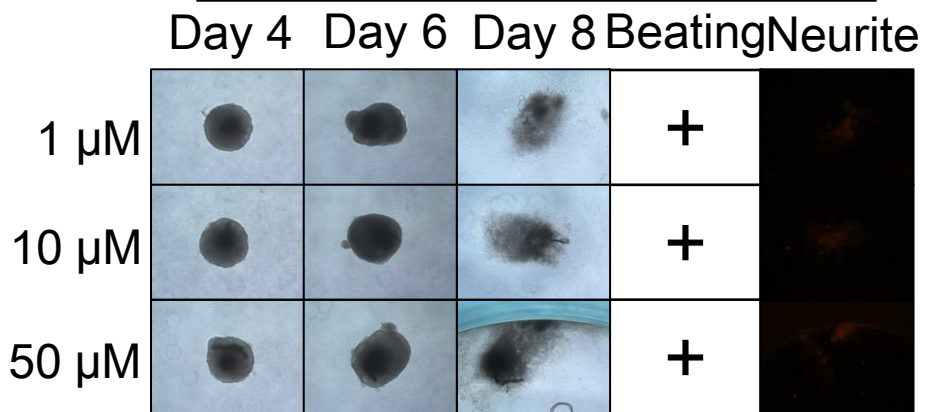

## OXANDROLONE

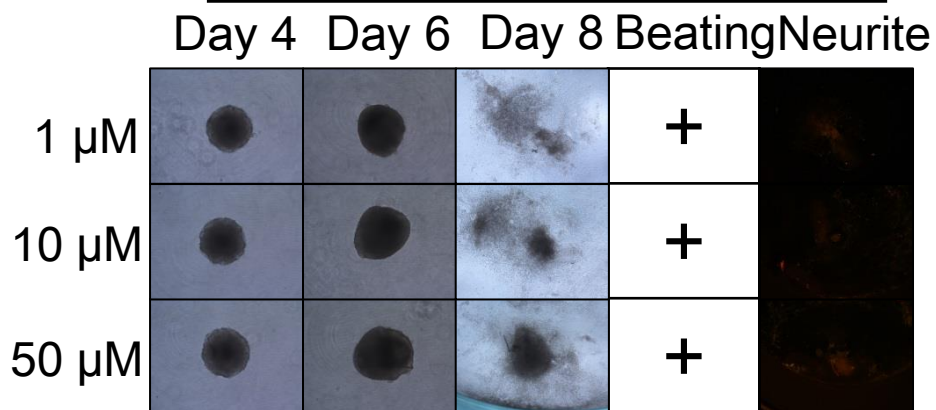

## CARMUSTINE

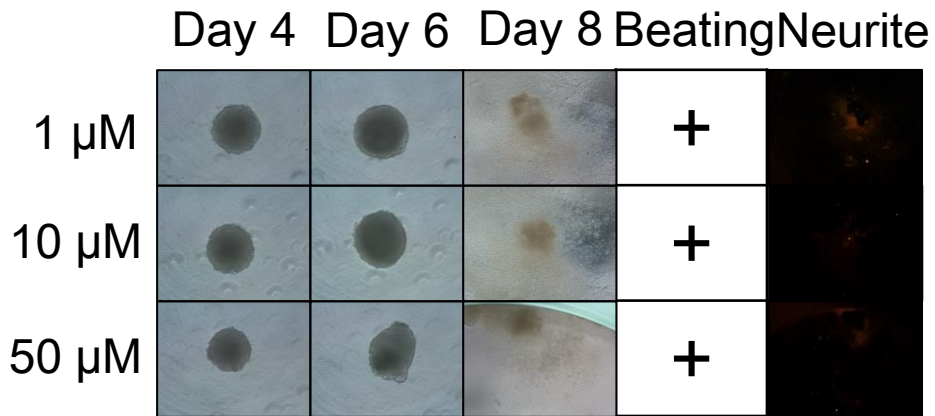

## MEPROBAMATE

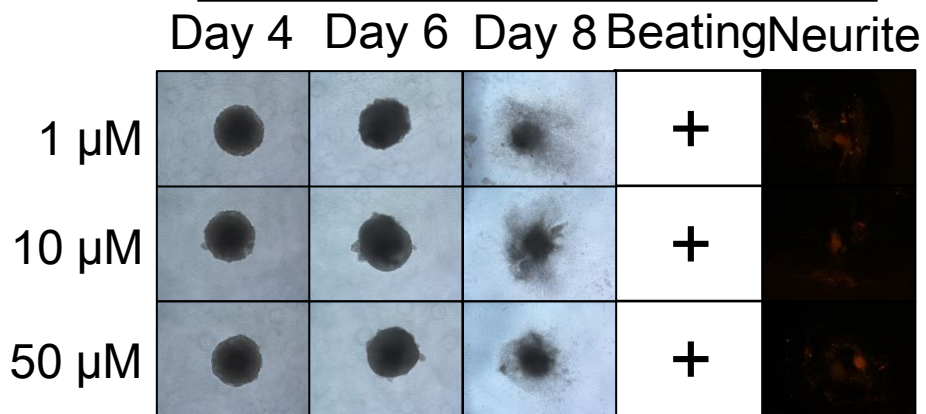

## TERPIN HYDRATE

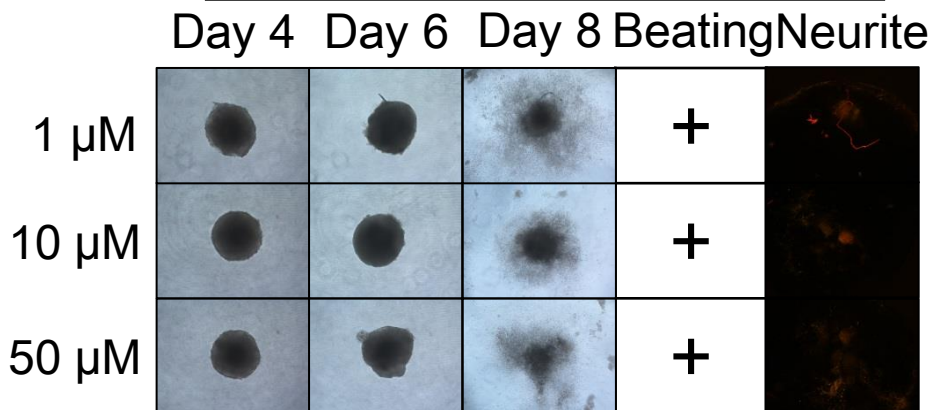

## CARBARSONE

|            | Day 4 | Day 6 | Day 8 | Beating | Neurite |
|------------|-------|-------|-------|---------|---------|
| 1 $\mu$ M  |       |       |       | +       |         |
| 10 $\mu$ M |       |       |       | +       |         |
| 50 $\mu$ M |       |       |       | +       |         |

## IODINE

|            | Day 4 | Day 6 | Day 8 | Beating | Neurite |
|------------|-------|-------|-------|---------|---------|
| 1 $\mu$ M  |       |       |       | +       |         |
| 10 $\mu$ M |       |       |       | +       |         |
| 50 $\mu$ M |       |       |       | +       |         |

## POVIDONE IODINE

|            | Day 4 | Day 6 | Day 8 | Beating | Neurite |
|------------|-------|-------|-------|---------|---------|
| 1 $\mu$ M  |       |       |       | +       |         |
| 10 $\mu$ M |       |       |       | +       |         |
| 50 $\mu$ M |       |       |       | +       |         |



## METHIMAZOLE

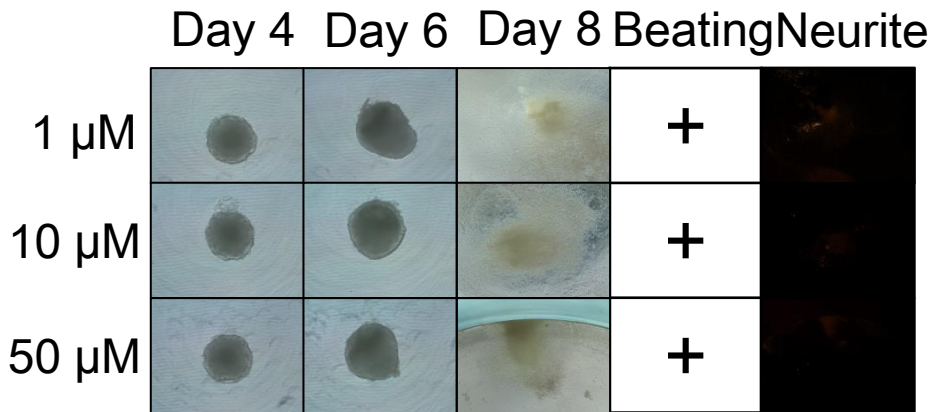

## NELARABINE

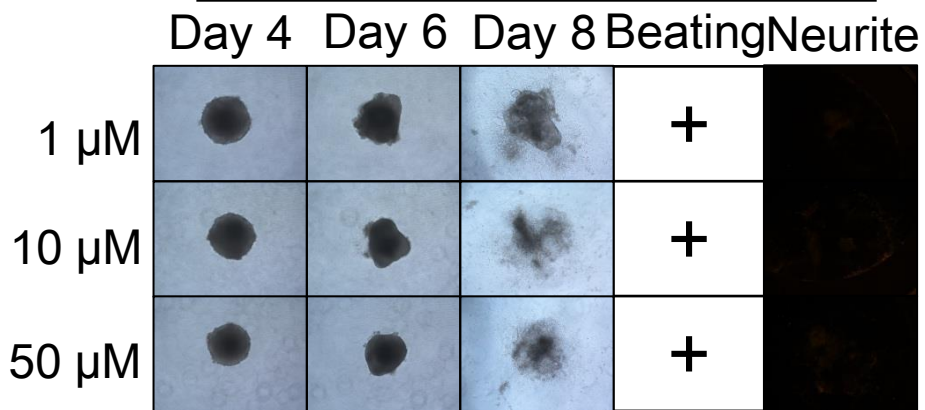

## FLUDARABINE

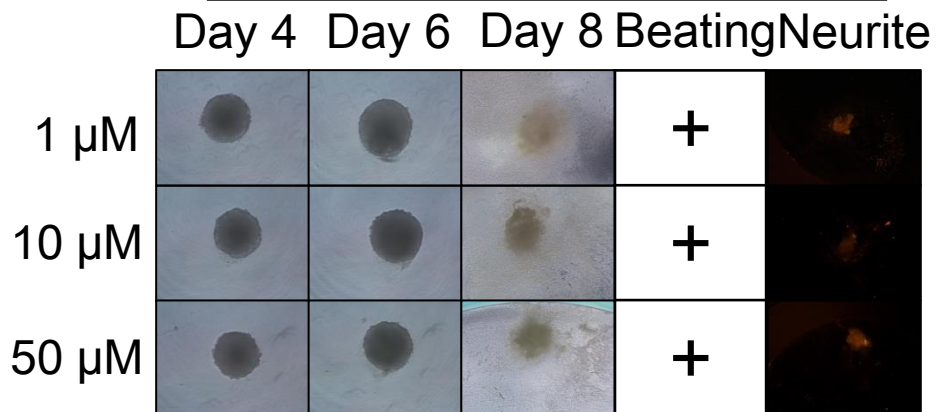

## POTASSIUM IODIDE

|            | Day 4                                                                             | Day 6                                                                             | Day 8                                                                             | Beating | Neurite                                                                             |
|------------|-----------------------------------------------------------------------------------|-----------------------------------------------------------------------------------|-----------------------------------------------------------------------------------|---------|-------------------------------------------------------------------------------------|
| 1 $\mu$ M  | 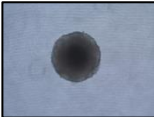 |  |  | +       |  |
| 10 $\mu$ M |  |  |  | +       |                                                                                     |
| 50 $\mu$ M |  |  |  | +       |                                                                                     |

## AMIODARONE

|            | Day 4                                                                              | Day 6                                                                              | Day 8                                                                              | Beating | Neurite                                                                              |
|------------|------------------------------------------------------------------------------------|------------------------------------------------------------------------------------|------------------------------------------------------------------------------------|---------|--------------------------------------------------------------------------------------|
| 1 $\mu$ M  | 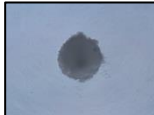  |   |   | +       |  |
| 10 $\mu$ M |   |   |   | +       |                                                                                      |
| 50 $\mu$ M |  |  |  | +       |                                                                                      |

# Class II

## THALIDOMIDE

|            | Day 4 | Day 6 | Day 8 | Beating | Neurite |
|------------|-------|-------|-------|---------|---------|
| 1 $\mu$ M  |       |       |       | +       |         |
| 10 $\mu$ M |       |       |       | +       |         |
| 50 $\mu$ M |       |       |       | +       |         |

## ESTROPIPATE

|            | Day 4 | Day 6 | Day 8 | Beating | Neurite |
|------------|-------|-------|-------|---------|---------|
| 1 $\mu$ M  |       |       |       | +       |         |
| 10 $\mu$ M |       |       |       | +       |         |
| 50 $\mu$ M |       |       |       | +       |         |

## NETILMICIN

|            | Day 4 | Day 6 | Day 8 | Beating | Neurite |
|------------|-------|-------|-------|---------|---------|
| 1 $\mu$ M  |       |       |       | +       |         |
| 10 $\mu$ M |       |       |       | +       |         |
| 50 $\mu$ M |       |       |       | -       |         |

## VALPROATE

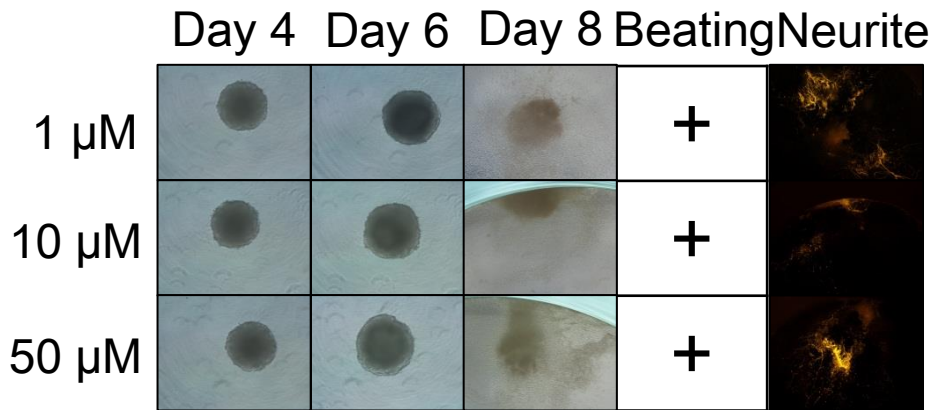

## OXYMETHOLONE

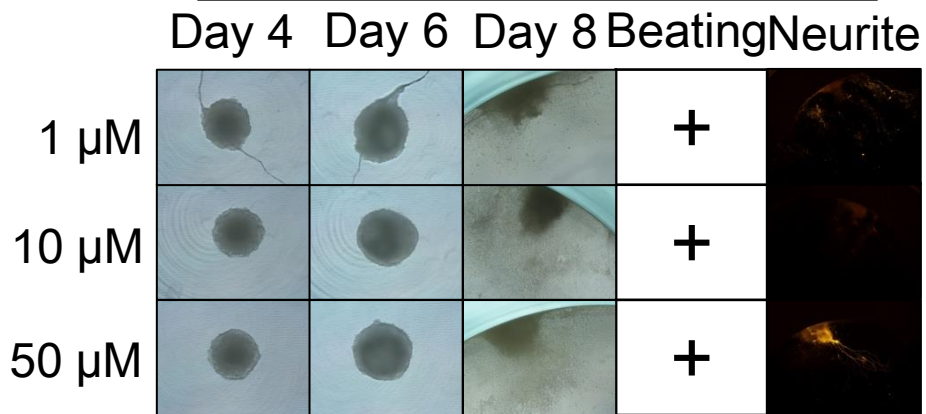

## LENALIDOMIDE

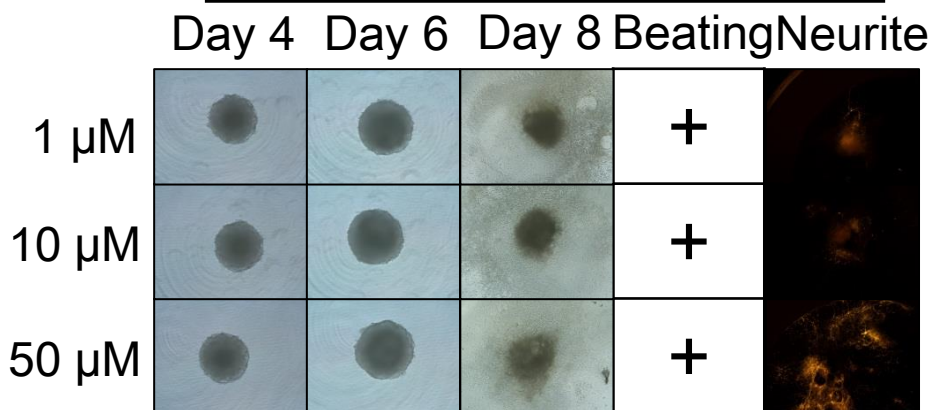

## CHLOROTRIANISENE

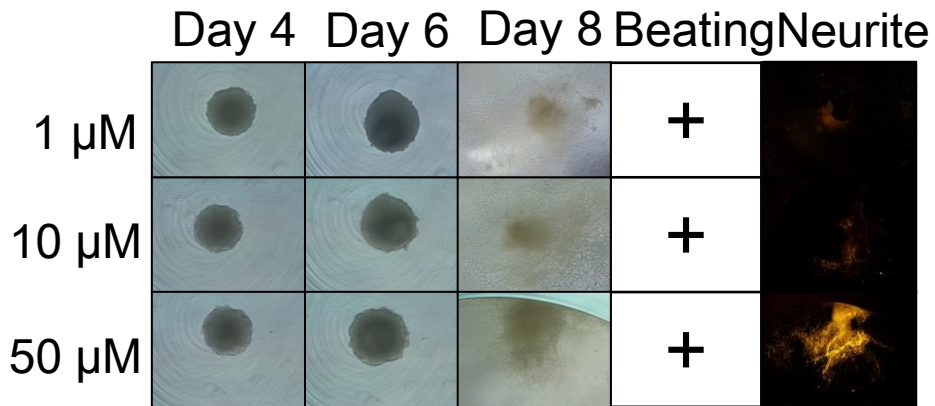

## DANAZOL

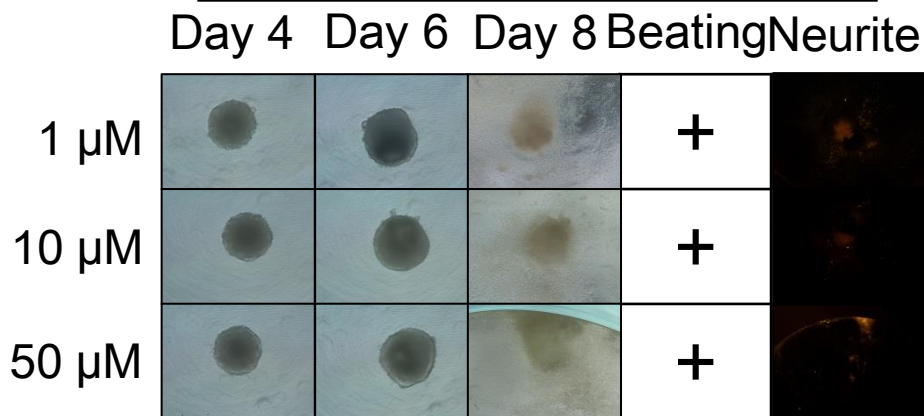

## FLUOXYMESTERONE

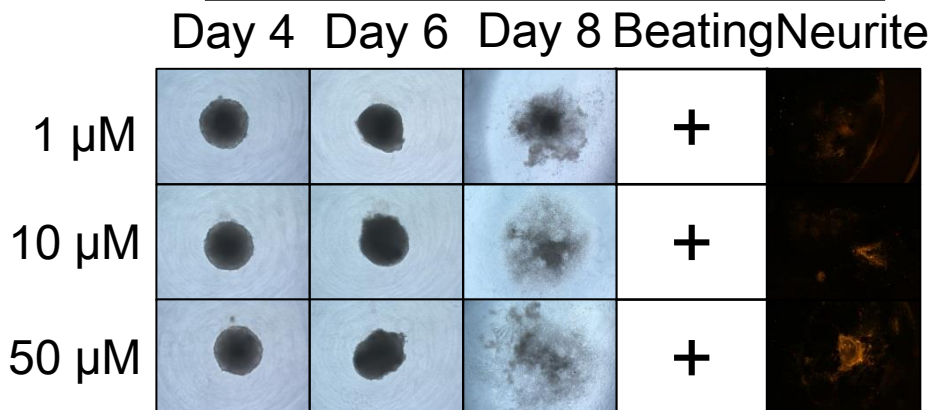

## FINASTERIDE

|            | Day 4                                                                             | Day 6                                                                             | Day 8                                                                             | Beating | Neurite                                                                             |
|------------|-----------------------------------------------------------------------------------|-----------------------------------------------------------------------------------|-----------------------------------------------------------------------------------|---------|-------------------------------------------------------------------------------------|
| 1 $\mu$ M  | 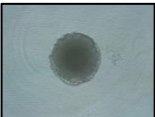 |  |  | +       |  |
| 10 $\mu$ M |  |  |  | +       |                                                                                     |
| 50 $\mu$ M |  |  |  | +       |                                                                                     |

## TAZAROTENE

|            | Day 4                                                                               | Day 6                                                                               | Day 8                                                                               | Beating | Neurite                                                                              |
|------------|-------------------------------------------------------------------------------------|-------------------------------------------------------------------------------------|-------------------------------------------------------------------------------------|---------|--------------------------------------------------------------------------------------|
| 1 $\mu$ M  | 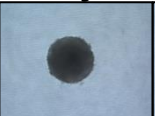   |    |    | -       |  |
| 10 $\mu$ M |   |   |   | -       |                                                                                      |
| 50 $\mu$ M |  |  |  | -       |                                                                                      |

## TESTOSTERONE

|            | Day 4                                                                               | Day 6                                                                               | Day 8                                                                               | Beating | Neurite                                                                               |
|------------|-------------------------------------------------------------------------------------|-------------------------------------------------------------------------------------|-------------------------------------------------------------------------------------|---------|---------------------------------------------------------------------------------------|
| 1 $\mu$ M  | 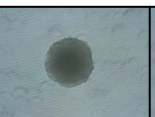 |  |  | +       |  |
| 10 $\mu$ M |  |  |  | +       |                                                                                       |
| 50 $\mu$ M |  |  |  | +       |                                                                                       |

## COUMARIN

|            | Day 4                                                                             | Day 6                                                                             | Day 8                                                                             | Beating | Neurite                                                                             |
|------------|-----------------------------------------------------------------------------------|-----------------------------------------------------------------------------------|-----------------------------------------------------------------------------------|---------|-------------------------------------------------------------------------------------|
| 1 $\mu$ M  | 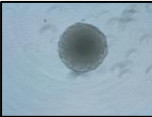 |  |  | +       |  |
| 10 $\mu$ M |  |  |  | +       |                                                                                     |
| 50 $\mu$ M |  |  |  | -       |                                                                                     |

## CETRORELIX

|            | Day 4                                                                              | Day 6                                                                              | Day 8                                                                              | Beating | Neurite                                                                              |
|------------|------------------------------------------------------------------------------------|------------------------------------------------------------------------------------|------------------------------------------------------------------------------------|---------|--------------------------------------------------------------------------------------|
| 1 $\mu$ M  | 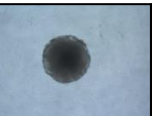  |   |   | +       |  |
| 10 $\mu$ M |   |   |   | +       |                                                                                      |
| 50 $\mu$ M |  |  |  | +       |                                                                                      |

## CHENODEOXYCHOLIC ACID

|            | Day 4                                                                               | Day 6                                                                               | Day 8                                                                               | Beating | Neurite                                                                               |
|------------|-------------------------------------------------------------------------------------|-------------------------------------------------------------------------------------|-------------------------------------------------------------------------------------|---------|---------------------------------------------------------------------------------------|
| 1 $\mu$ M  | 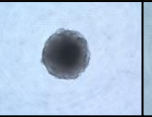 |  |  | +       |  |
| 10 $\mu$ M |  |  |  | +       |                                                                                       |
| 50 $\mu$ M |  |  |  | +       |                                                                                       |

## MESTRANOL

|            | Day 4                                                                             | Day 6                                                                             | Day 8                                                                             | Beating | Neurite                                                                             |
|------------|-----------------------------------------------------------------------------------|-----------------------------------------------------------------------------------|-----------------------------------------------------------------------------------|---------|-------------------------------------------------------------------------------------|
| 1 $\mu$ M  | 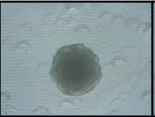 |  |  | +       |  |
| 10 $\mu$ M |  |  |  | +       |                                                                                     |
| 50 $\mu$ M |  |  |  | -       |                                                                                     |

## DIHYDROERGOTAMINE

|            | Day 4                                                                              | Day 6                                                                              | Day 8                                                                              | Beating | Neurite                                                                              |
|------------|------------------------------------------------------------------------------------|------------------------------------------------------------------------------------|------------------------------------------------------------------------------------|---------|--------------------------------------------------------------------------------------|
| 1 $\mu$ M  | 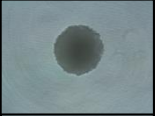  |   |   | +       |  |
| 10 $\mu$ M |   |   |   | +       |                                                                                      |
| 50 $\mu$ M |  |  |  | -       |                                                                                      |

## ETHINYL ESTRADIOL

|            | Day 4                                                                               | Day 6                                                                               | Day 8                                                                               | Beating | Neurite                                                                               |
|------------|-------------------------------------------------------------------------------------|-------------------------------------------------------------------------------------|-------------------------------------------------------------------------------------|---------|---------------------------------------------------------------------------------------|
| 1 $\mu$ M  | 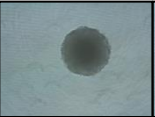 |  |  | +       |  |
| 10 $\mu$ M |  |  |  | +       |                                                                                       |
| 50 $\mu$ M |  |  |  | -       |                                                                                       |



## MEDROXY PROGESTERONE

Day 4 Day 6 Day 8 Beating Neurite

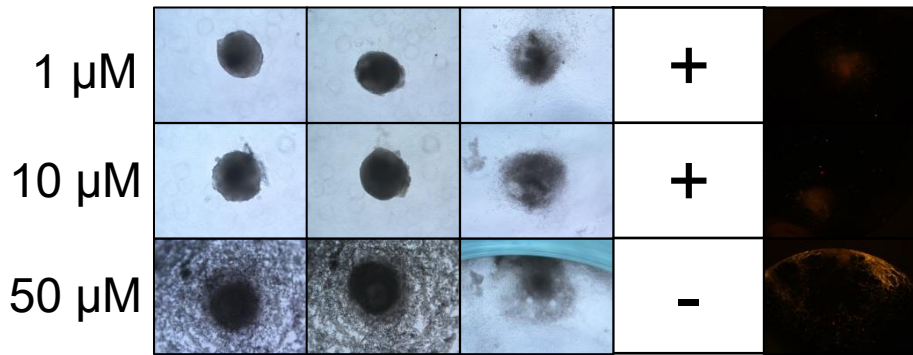

## TRIAZOLAM

Day 4 Day 6 Day 8 Beating Neurite

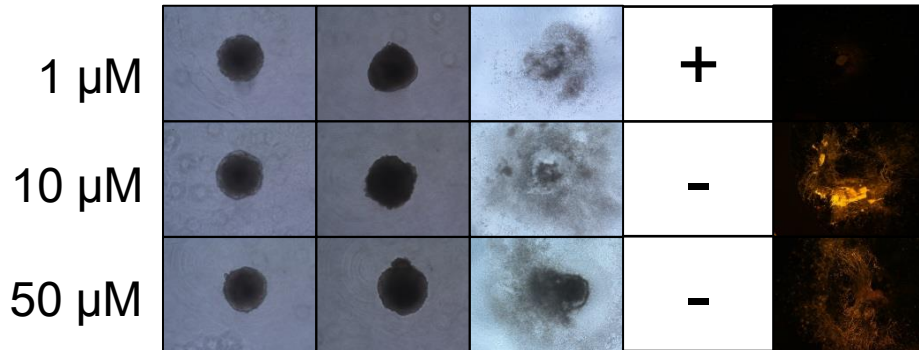

## ESTAZOLAM

Day 4 Day 6 Day 8 Beating Neurite

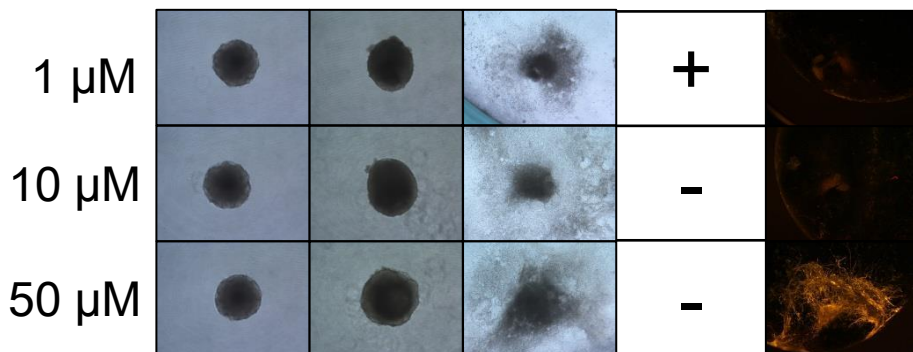

## CLONAZEPAM

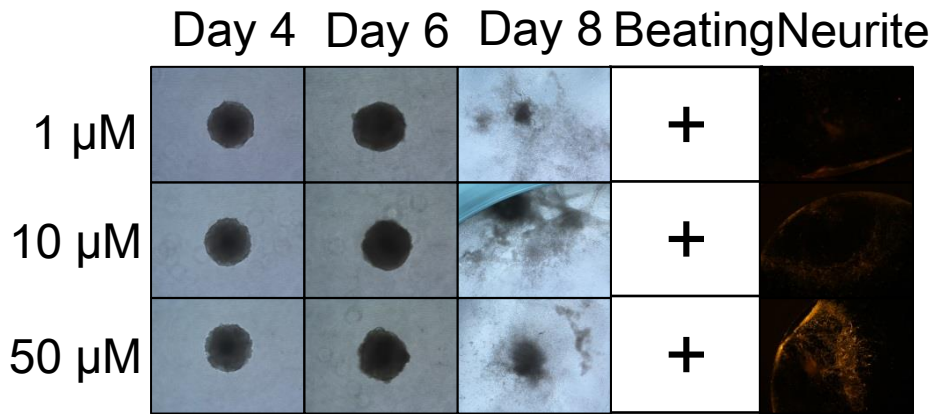

## LETROZOLE

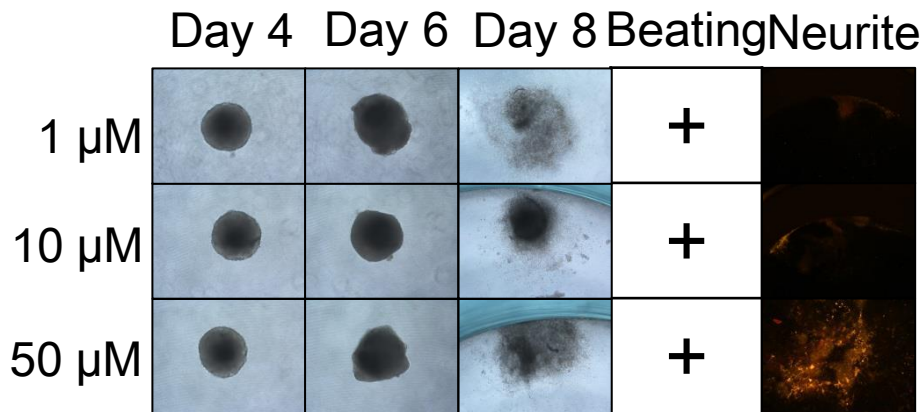

## OXAZEPAM

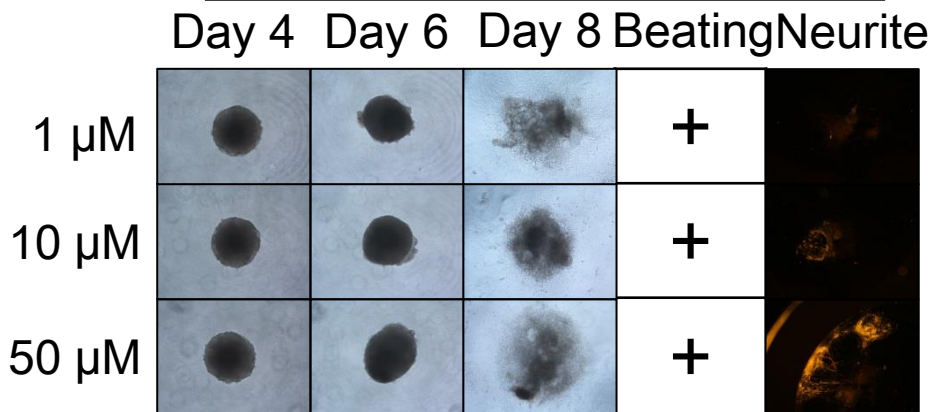

## VORICONAZOLE

|            | Day 4                                                                             | Day 6                                                                             | Day 8                                                                             | Beating | Neurite                                                                             |
|------------|-----------------------------------------------------------------------------------|-----------------------------------------------------------------------------------|-----------------------------------------------------------------------------------|---------|-------------------------------------------------------------------------------------|
| 1 $\mu$ M  | 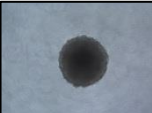 |  |  | +       |  |
| 10 $\mu$ M |  |  |  | +       |                                                                                     |
| 50 $\mu$ M |  |  |  | +       |                                                                                     |

## THIAMAZOLE

|            | Day 4                                                                              | Day 6                                                                              | Day 8                                                                              | Beating | Neurite                                                                              |
|------------|------------------------------------------------------------------------------------|------------------------------------------------------------------------------------|------------------------------------------------------------------------------------|---------|--------------------------------------------------------------------------------------|
| 1 $\mu$ M  | 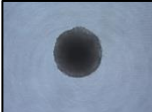  |   |   | +       |  |
| 10 $\mu$ M |   |   |   | +       |                                                                                      |
| 50 $\mu$ M |  |  |  | +       |                                                                                      |

## NILOTINIB

|            | Day 4                                                                               | Day 6                                                                               | Day 8                                                                               | Beating | Neurite                                                                               |
|------------|-------------------------------------------------------------------------------------|-------------------------------------------------------------------------------------|-------------------------------------------------------------------------------------|---------|---------------------------------------------------------------------------------------|
| 1 $\mu$ M  | 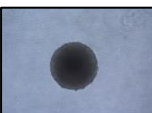 |  |  | +       |  |
| 10 $\mu$ M |  |  |  | +       |                                                                                       |
| 50 $\mu$ M |  |  |  | -       |                                                                                       |

## PENICILLAMINE

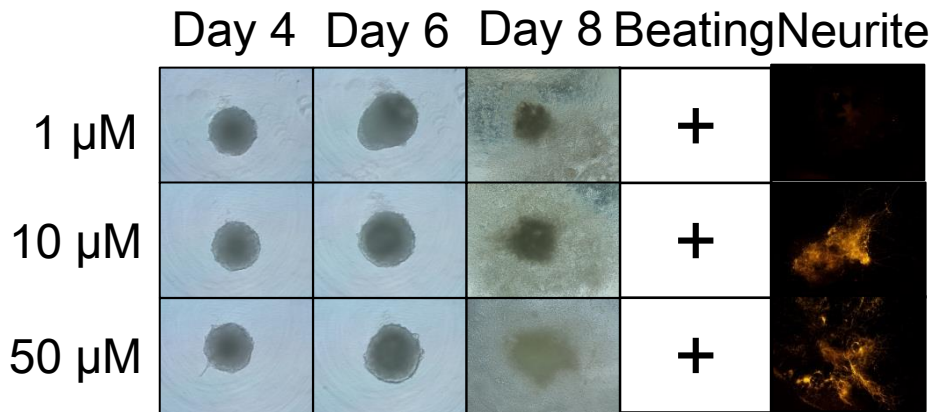

## ATENOLOL

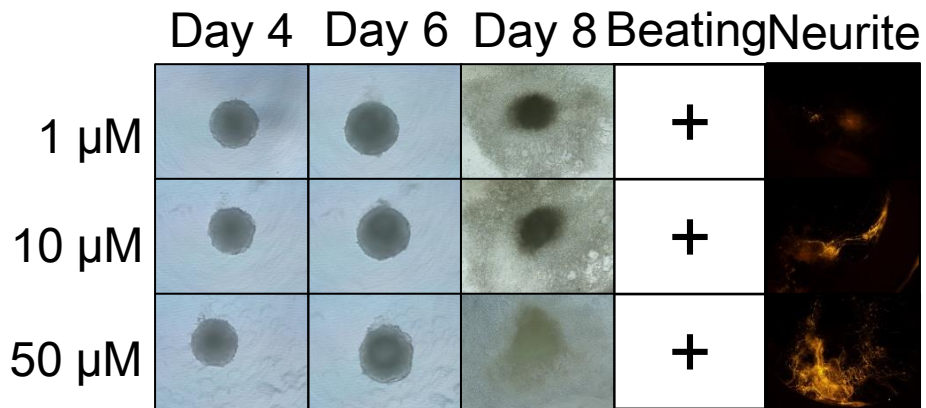

## CARBAMAZEPINE

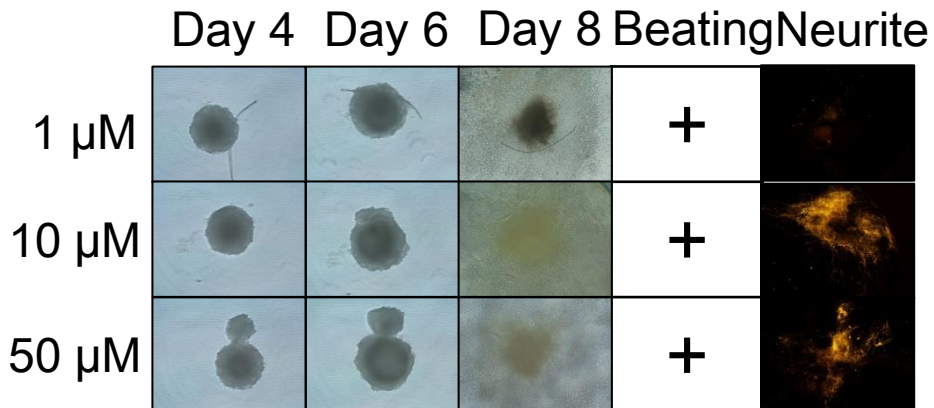

## DEMECLOCYCLINE

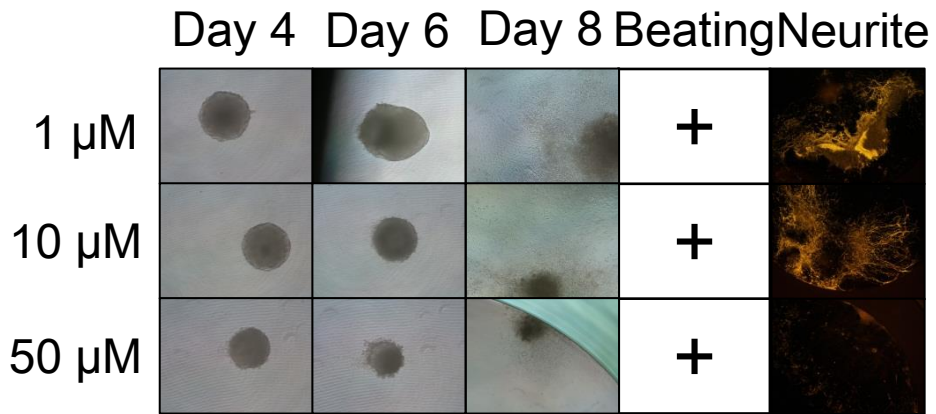

## KANAMYCIN

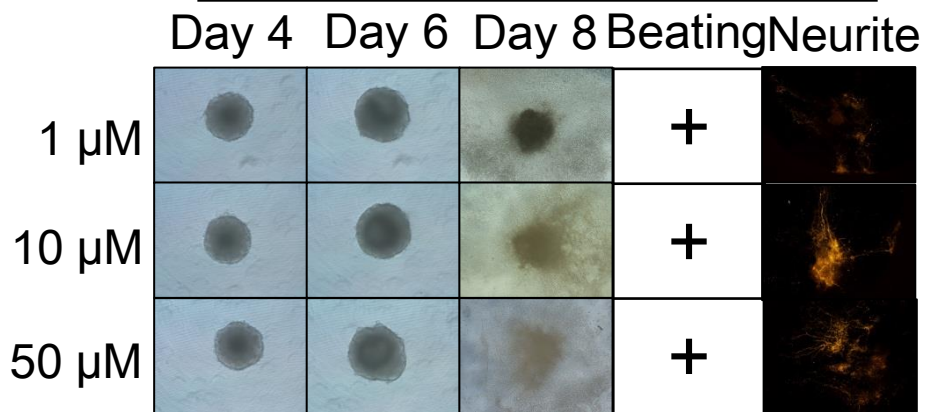

## PROPYLTHIOURACIL

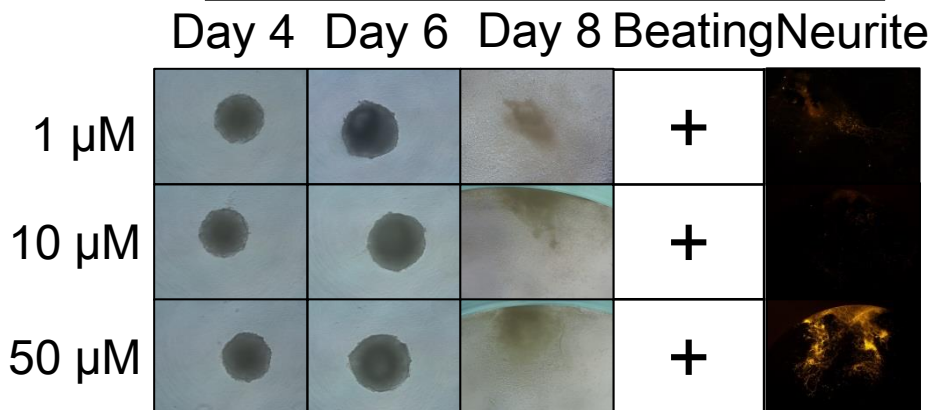

## TETRACYCLINE

|            | Day 4 | Day 6 | Day 8 | Beating | Neurite |
|------------|-------|-------|-------|---------|---------|
| 1 $\mu$ M  |       |       |       | +       |         |
| 10 $\mu$ M |       |       |       | +       |         |
| 50 $\mu$ M |       |       |       | +       |         |

## FLUTAMIDE

|            | Day 4 | Day 6 | Day 8 | Beating | Neurite |
|------------|-------|-------|-------|---------|---------|
| 1 $\mu$ M  |       |       |       | +       |         |
| 10 $\mu$ M |       |       |       | +       |         |
| 50 $\mu$ M |       |       |       | +       |         |

## ALTRETAMINE

|            | Day 4 | Day 6 | Day 8 | Beating | Neurite |
|------------|-------|-------|-------|---------|---------|
| 1 $\mu$ M  |       |       |       | +       |         |
| 10 $\mu$ M |       |       |       | -       |         |
| 50 $\mu$ M |       |       |       | -       |         |

## PAROXETINE

|            | Day 4 | Day 6 | Day 8 | Beating | Neurite |
|------------|-------|-------|-------|---------|---------|
| 1 $\mu$ M  |       |       |       | +       |         |
| 10 $\mu$ M |       |       |       | +       |         |
| 50 $\mu$ M |       |       |       | -       | -       |

## LITHIUM

|            | Day 4 | Day 6 | Day 8 | Beating | Neurite |
|------------|-------|-------|-------|---------|---------|
| 1 $\mu$ M  |       |       |       | +       |         |
| 10 $\mu$ M |       |       |       | +       |         |
| 50 $\mu$ M |       |       |       | +       |         |

## EXEMESTANE

|            | Day 4 | Day 6 | Day 8 | Beating | Neurite |
|------------|-------|-------|-------|---------|---------|
| 1 $\mu$ M  |       |       |       | +       |         |
| 10 $\mu$ M |       |       |       | +       |         |
| 50 $\mu$ M |       |       |       | +       |         |

## PERINDOPRIL

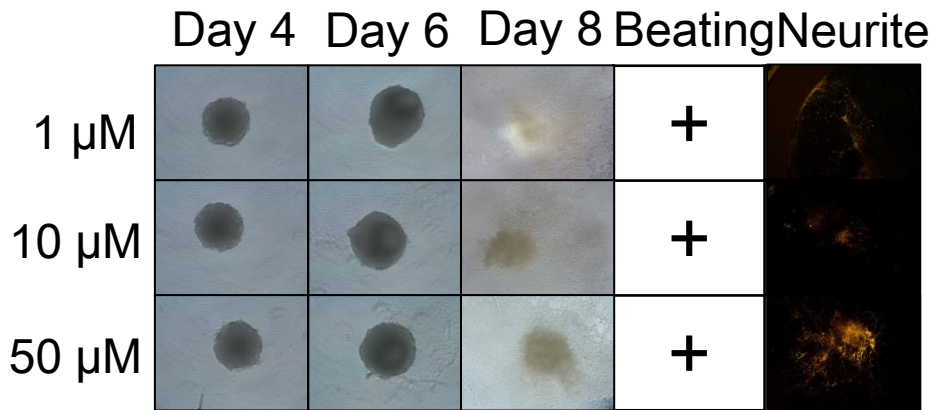

## CARBIMAZOLE

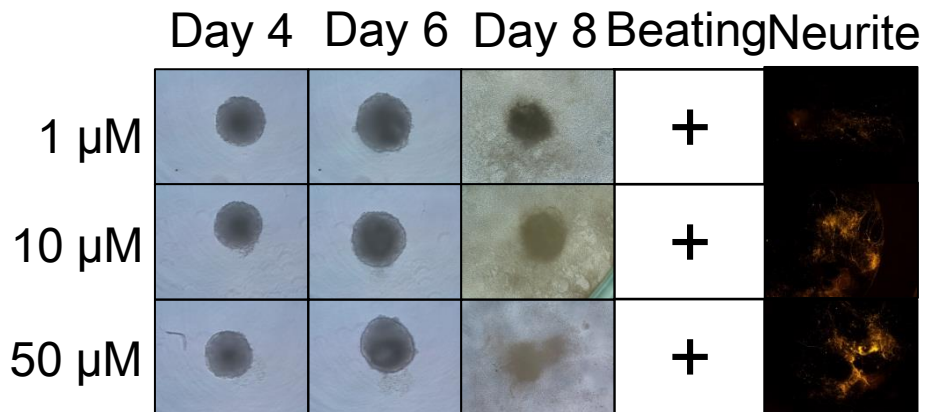

## ETHISTERONE

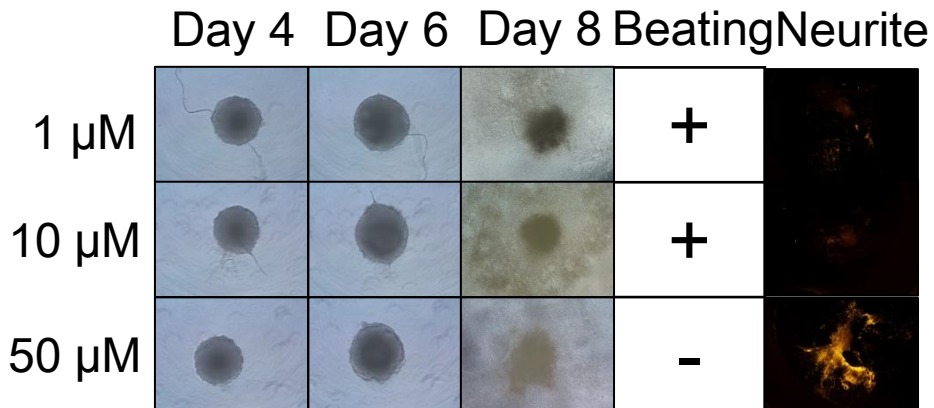



## TEMOZOLOMIDE

|            | Day 4                                                                             | Day 6                                                                             | Day 8                                                                             | Beating | Neurite                                                                             |
|------------|-----------------------------------------------------------------------------------|-----------------------------------------------------------------------------------|-----------------------------------------------------------------------------------|---------|-------------------------------------------------------------------------------------|
| 1 $\mu$ M  | 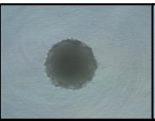 |  |  | +       |  |
| 10 $\mu$ M |  |  |  | +       |                                                                                     |
| 50 $\mu$ M |  |  |  | +       |                                                                                     |

## OXYTETRACYCLINE

|            | Day 4                                                                              | Day 6                                                                              | Day 8                                                                              | Beating | Neurite                                                                              |
|------------|------------------------------------------------------------------------------------|------------------------------------------------------------------------------------|------------------------------------------------------------------------------------|---------|--------------------------------------------------------------------------------------|
| 1 $\mu$ M  | 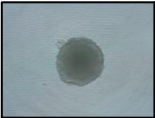  |   |   | +       |  |
| 10 $\mu$ M |   |   |   | -       |                                                                                      |
| 50 $\mu$ M |  |  |  | -       |                                                                                      |

## CYCLOPHOSPHAMIDE

|            | Day 4                                                                               | Day 6                                                                               | Day 8                                                                               | Beating | Neurite                                                                               |
|------------|-------------------------------------------------------------------------------------|-------------------------------------------------------------------------------------|-------------------------------------------------------------------------------------|---------|---------------------------------------------------------------------------------------|
| 1 $\mu$ M  | 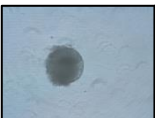 |  |  | +       |  |
| 10 $\mu$ M |  |  |  | +       |                                                                                       |
| 50 $\mu$ M |  |  |  | -       |                                                                                       |

## PHENTERMINE

|            | Day 4 | Day 6 | Day 8 | Beating | Neurite |
|------------|-------|-------|-------|---------|---------|
| 1 $\mu$ M  |       |       |       | +       |         |
| 10 $\mu$ M |       |       |       | -       |         |
| 50 $\mu$ M |       |       |       | -       |         |

## CISPLATIN

|            | Day 4 | Day 6 | Day 8 | Beating | Neurite |
|------------|-------|-------|-------|---------|---------|
| 1 $\mu$ M  |       |       |       | +       |         |
| 10 $\mu$ M |       |       |       | +       |         |
| 50 $\mu$ M |       |       |       | +       |         |

## ETRETINATE

|            | Day 4 | Day 6 | Day 8 | Beating | Neurite |
|------------|-------|-------|-------|---------|---------|
| 1 $\mu$ M  |       |       |       | -       |         |
| 10 $\mu$ M |       |       |       | -       |         |
| 50 $\mu$ M |       |       |       | -       |         |

## DIENESTROL

|            | Day 4                                                                             | Day 6                                                                             | Day 8                                                                             | Beating | Neurite                                                                             |
|------------|-----------------------------------------------------------------------------------|-----------------------------------------------------------------------------------|-----------------------------------------------------------------------------------|---------|-------------------------------------------------------------------------------------|
| 1 $\mu$ M  | 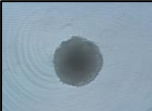 |  |  | +       |  |
| 10 $\mu$ M |  |  |  | -       |                                                                                     |
| 50 $\mu$ M |  |  |  | -       |                                                                                     |

## ESTRADIOL

|            | Day 4                                                                              | Day 6                                                                              | Day 8                                                                              | Beating | Neurite                                                                              |
|------------|------------------------------------------------------------------------------------|------------------------------------------------------------------------------------|------------------------------------------------------------------------------------|---------|--------------------------------------------------------------------------------------|
| 1 $\mu$ M  | 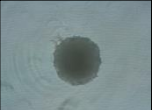  |   |   | +       |  |
| 10 $\mu$ M |   |   |   | -       |                                                                                      |
| 50 $\mu$ M |  |  |  | -       |                                                                                      |

## ESTRONE

|            | Day 4                                                                               | Day 6                                                                               | Day 8                                                                               | Beating | Neurite                                                                               |
|------------|-------------------------------------------------------------------------------------|-------------------------------------------------------------------------------------|-------------------------------------------------------------------------------------|---------|---------------------------------------------------------------------------------------|
| 1 $\mu$ M  | 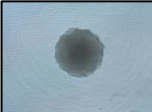 |  |  | +       |  |
| 10 $\mu$ M |  |  |  | -       |                                                                                       |
| 50 $\mu$ M |  |  |  | -       |                                                                                       |

## WARFARIN

|            | Day 4                                                                             | Day 6                                                                             | Day 8                                                                             | Beating | Neurite                                                                             |
|------------|-----------------------------------------------------------------------------------|-----------------------------------------------------------------------------------|-----------------------------------------------------------------------------------|---------|-------------------------------------------------------------------------------------|
| 1 $\mu$ M  | 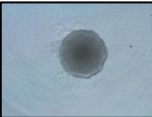 |  |  | +       |  |
| 10 $\mu$ M |  |  |  | +       |                                                                                     |
| 50 $\mu$ M |  |  |  | -       |                                                                                     |

## ISOTRETINOIN

|            | Day 4                                                                              | Day 6                                                                              | Day 8                                                                              | Beating | Neurite                                                                              |
|------------|------------------------------------------------------------------------------------|------------------------------------------------------------------------------------|------------------------------------------------------------------------------------|---------|--------------------------------------------------------------------------------------|
| 1 $\mu$ M  | 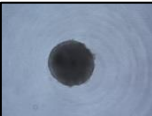  |   |   | -       |  |
| 10 $\mu$ M |   |   |   | -       |                                                                                      |
| 50 $\mu$ M |  |  |  | -       |                                                                                      |

## METHYSERGIDE

|            | Day 4                                                                               | Day 6                                                                               | Day 8                                                                               | Beating | Neurite                                                                               |
|------------|-------------------------------------------------------------------------------------|-------------------------------------------------------------------------------------|-------------------------------------------------------------------------------------|---------|---------------------------------------------------------------------------------------|
| 1 $\mu$ M  | 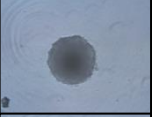 |  |  | -       |  |
| 10 $\mu$ M |  |  |  | -       |                                                                                       |
| 50 $\mu$ M |  |  |  | -       |                                                                                       |

## LEVONORGESTREL

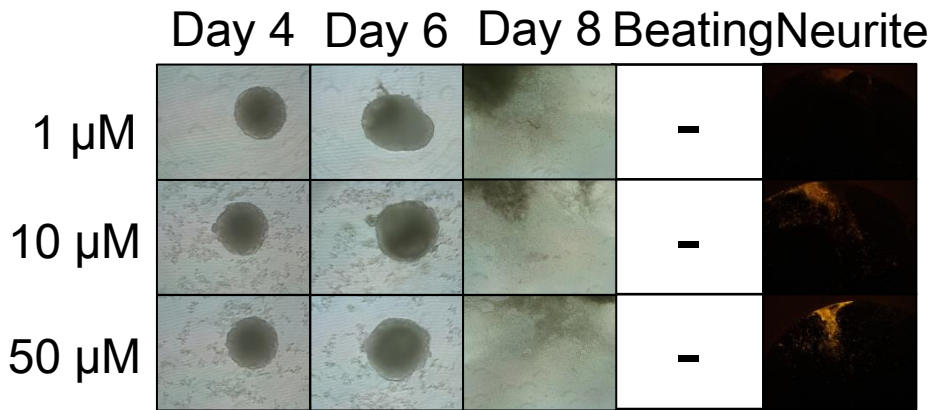

## ACITRETIN

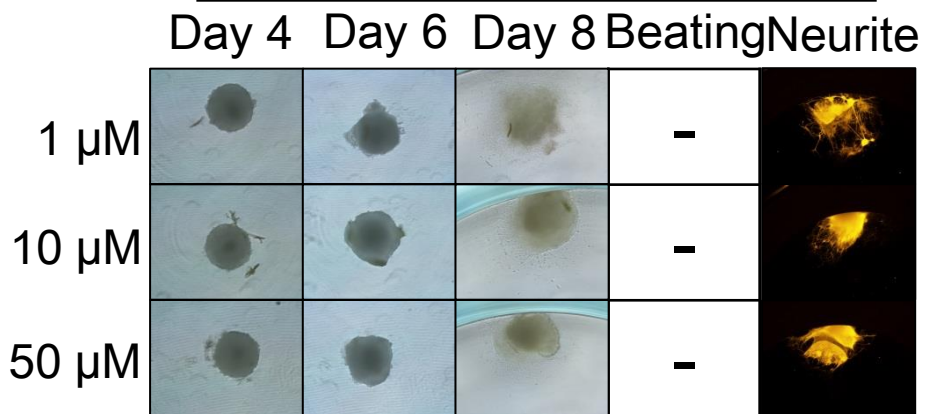

## FLURAZEPAM

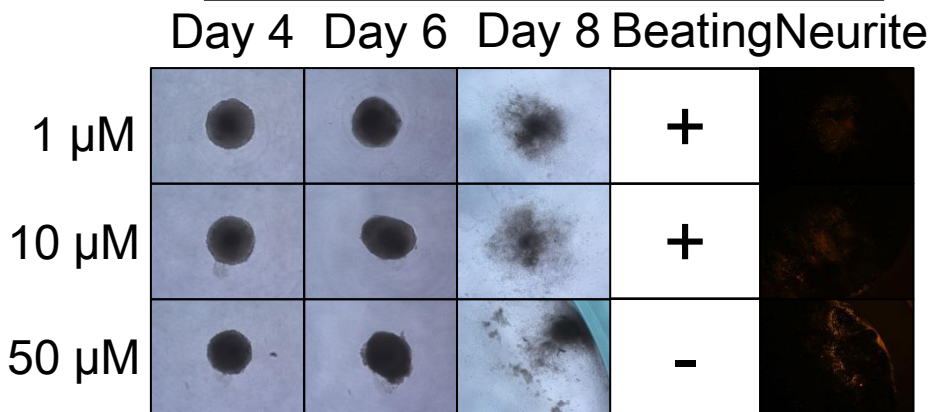

### TEMAZEPAM

|            | Day 4 | Day 6 | Day 8 | Beating | Neurite |
|------------|-------|-------|-------|---------|---------|
| 1 $\mu$ M  |       |       |       | +       |         |
| 10 $\mu$ M |       |       |       | +       |         |
| 50 $\mu$ M |       |       |       | -       |         |

### MIDAZOLAM

|            | Day 4 | Day 6 | Day 8 | Beating | Neurite |
|------------|-------|-------|-------|---------|---------|
| 1 $\mu$ M  |       |       |       | +       |         |
| 10 $\mu$ M |       |       |       | -       |         |
| 50 $\mu$ M |       |       |       | -       |         |

### PHENOBARBITONE

|            | Day 4 | Day 6 | Day 8 | Beating | Neurite |
|------------|-------|-------|-------|---------|---------|
| 1 $\mu$ M  |       |       |       | +       |         |
| 10 $\mu$ M |       |       |       | +       |         |
| 50 $\mu$ M |       |       |       | -       |         |

## ALPRAZOLAM

|            | Day 4 | Day 6 | Day 8 | Beating | Neurite |
|------------|-------|-------|-------|---------|---------|
| 1 $\mu$ M  |       |       |       | +       |         |
| 10 $\mu$ M |       |       |       | -       |         |
| 50 $\mu$ M |       |       |       | -       |         |

## DIAZEPAM

|            | Day 4 | Day 6 | Day 8 | Beating | Neurite |
|------------|-------|-------|-------|---------|---------|
| 1 $\mu$ M  |       |       |       | +       |         |
| 10 $\mu$ M |       |       |       | +       |         |
| 50 $\mu$ M |       |       |       | -       |         |

## TIGECYCLINE

|            | Day 4 | Day 6 | Day 8 | Beating | Neurite |
|------------|-------|-------|-------|---------|---------|
| 1 $\mu$ M  |       |       |       | +       |         |
| 10 $\mu$ M |       |       |       | +       |         |
| 50 $\mu$ M |       |       |       | -       |         |

## MINOCYCLINE

|            | Day 4 | Day 6 | Day 8 | Beating | Neurite |
|------------|-------|-------|-------|---------|---------|
| 1 $\mu$ M  |       |       |       | +       |         |
| 10 $\mu$ M |       |       |       | -       |         |
| 50 $\mu$ M |       |       |       | -       |         |

## PHENINDIONE

|            | Day 4 | Day 6 | Day 8 | Beating | Neurite |
|------------|-------|-------|-------|---------|---------|
| 1 $\mu$ M  |       |       |       | +       |         |
| 10 $\mu$ M |       |       |       | +       |         |
| 50 $\mu$ M |       |       |       | -       |         |

## PHENYTOIN

|            | Day 4 | Day 6 | Day 8 | Beating | Neurite |
|------------|-------|-------|-------|---------|---------|
| 1 $\mu$ M  |       |       |       | +       |         |
| 10 $\mu$ M |       |       |       | +       |         |
| 50 $\mu$ M |       |       |       | -       |         |



## AMIKACIN

|            | Day 4                                                                             | Day 6                                                                             | Day 8                                                                             | Beating | Neurite                                                                             |
|------------|-----------------------------------------------------------------------------------|-----------------------------------------------------------------------------------|-----------------------------------------------------------------------------------|---------|-------------------------------------------------------------------------------------|
| 1 $\mu$ M  | 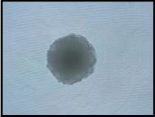 |  |  | +       |  |
| 10 $\mu$ M |  |  |  | +       |                                                                                     |
| 50 $\mu$ M |  |  |  | -       |                                                                                     |

## DOXYCYCLINE

|            | Day 4                                                                              | Day 6                                                                              | Day 8                                                                              | Beating | Neurite                                                                              |
|------------|------------------------------------------------------------------------------------|------------------------------------------------------------------------------------|------------------------------------------------------------------------------------|---------|--------------------------------------------------------------------------------------|
| 1 $\mu$ M  | 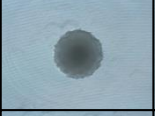  |   |   | +       |  |
| 10 $\mu$ M |   |   |   | +       |                                                                                      |
| 50 $\mu$ M |  |  |  | -       |                                                                                      |

## STREPTOMYCIN

|            | Day 4                                                                               | Day 6                                                                               | Day 8                                                                               | Beating | Neurite                                                                               |
|------------|-------------------------------------------------------------------------------------|-------------------------------------------------------------------------------------|-------------------------------------------------------------------------------------|---------|---------------------------------------------------------------------------------------|
| 1 $\mu$ M  | 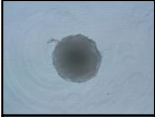 |  |  | -       |  |
| 10 $\mu$ M |  |  |  | -       |                                                                                       |
| 50 $\mu$ M |  |  |  | -       |                                                                                       |

# TOBRAMYCIN

|                  | Day 4                                                                             | Day 6                                                                             | Day 8                                                                             | Beating | Neurite                                                                             |
|------------------|-----------------------------------------------------------------------------------|-----------------------------------------------------------------------------------|-----------------------------------------------------------------------------------|---------|-------------------------------------------------------------------------------------|
| 1 $\mu\text{M}$  | 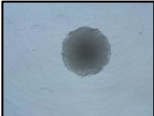 |  |  | +       |  |
| 10 $\mu\text{M}$ |  |  |  | -       |                                                                                     |
| 50 $\mu\text{M}$ |  |  |  | -       |                                                                                     |

# Class III

## NAFARELIN

|            | Day 4 | Day 6 | Day 8 | Beating | Neurite |
|------------|-------|-------|-------|---------|---------|
| 1 $\mu$ M  |       |       |       | +       |         |
| 10 $\mu$ M |       |       |       | -       |         |
| 50 $\mu$ M |       |       |       | -       |         |

## MIFEPRISTONE

|            | Day 4 | Day 6 | Day 8 | Beating | Neurite |
|------------|-------|-------|-------|---------|---------|
| 1 $\mu$ M  |       |       |       | +       |         |
| 10 $\mu$ M |       |       |       | +       |         |
| 50 $\mu$ M |       |       |       | -       |         |

## NORETHISTERONE

|            | Day 4 | Day 6 | Day 8 | Beating | Neurite |
|------------|-------|-------|-------|---------|---------|
| 1 $\mu$ M  |       |       |       | +       |         |
| 10 $\mu$ M |       |       |       | +       |         |
| 50 $\mu$ M |       |       |       | -       |         |

## RALOXIFENE

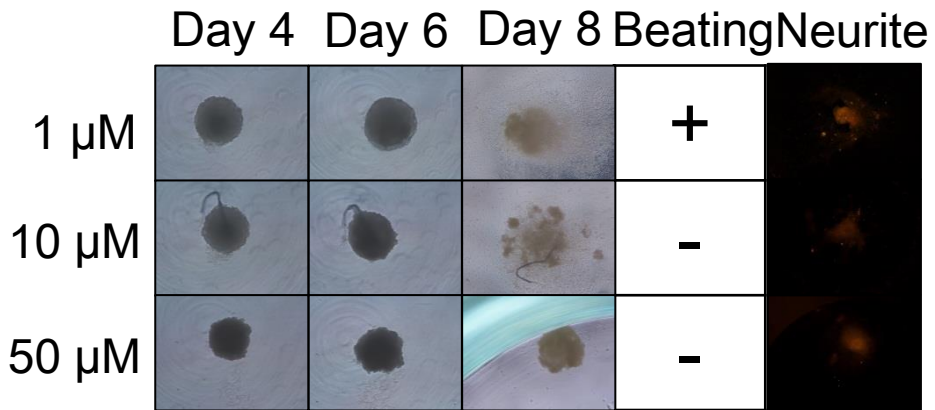

## METHOTREXATE

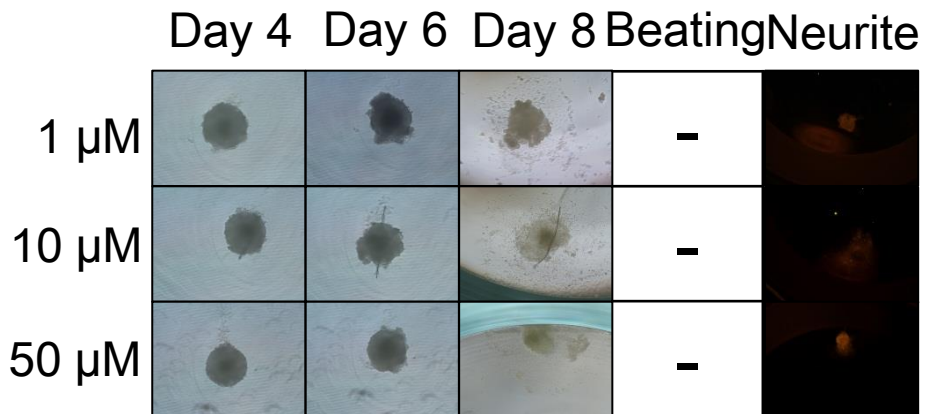

## MYCOPHENOLIC ACID

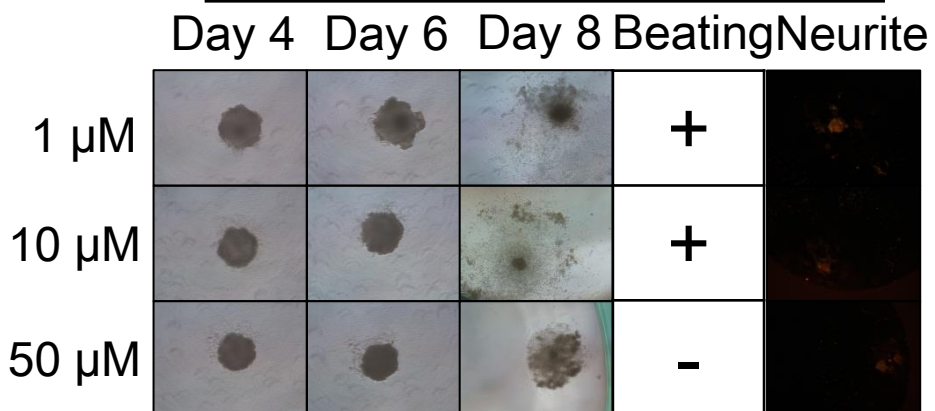

## LEFLUNOMIDE

|            | Day 4                                                                             | Day 6                                                                             | Day 8                                                                             | Beating | Neurite                                                                             |
|------------|-----------------------------------------------------------------------------------|-----------------------------------------------------------------------------------|-----------------------------------------------------------------------------------|---------|-------------------------------------------------------------------------------------|
| 1 $\mu$ M  | 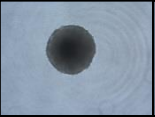 |  |  | +       |  |
| 10 $\mu$ M |  |  |  | -       |                                                                                     |
| 50 $\mu$ M |  |  |  | -       |                                                                                     |

## DUTASTERIDE

|            | Day 4                                                                              | Day 6                                                                              | Day 8                                                                              | Beating | Neurite                                                                              |
|------------|------------------------------------------------------------------------------------|------------------------------------------------------------------------------------|------------------------------------------------------------------------------------|---------|--------------------------------------------------------------------------------------|
| 1 $\mu$ M  | 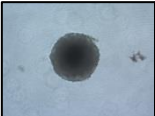  |   |   | +       |  |
| 10 $\mu$ M |   |   |   | +       |                                                                                      |
| 50 $\mu$ M |  |  |  | -       |                                                                                      |

## CLOMIFENE

|            | Day 4                                                                               | Day 6                                                                               | Day 8                                                                               | Beating | Neurite                                                                               |
|------------|-------------------------------------------------------------------------------------|-------------------------------------------------------------------------------------|-------------------------------------------------------------------------------------|---------|---------------------------------------------------------------------------------------|
| 1 $\mu$ M  | 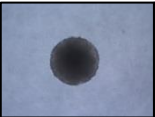 |  |  | +       |  |
| 10 $\mu$ M |  |  |  | +       |                                                                                       |
| 50 $\mu$ M |  |  |  | -       |                                                                                       |

## MEGESTROL

|            | Day 4 | Day 6 | Day 8 | Beating | Neurite |
|------------|-------|-------|-------|---------|---------|
| 1 $\mu$ M  |       |       |       | +       |         |
| 10 $\mu$ M |       |       |       | +       |         |
| 50 $\mu$ M |       |       |       | -       |         |

## EFAVIRENZ

|            | Day 4 | Day 6 | Day 8 | Beating | Neurite |
|------------|-------|-------|-------|---------|---------|
| 1 $\mu$ M  |       |       |       | +       |         |
| 10 $\mu$ M |       |       |       | +       |         |
| 50 $\mu$ M |       |       |       | -       |         |

## HYDROXYCARBAMIDE

|            | Day 4 | Day 6 | Day 8 | Beating | Neurite |
|------------|-------|-------|-------|---------|---------|
| 1 $\mu$ M  |       |       |       | +       |         |
| 10 $\mu$ M |       |       |       | -       |         |
| 50 $\mu$ M |       |       |       | -       |         |

## HYDROXY PROGESTERONE

|            | Day 4                                                                             | Day 6                                                                             | Day 8                                                                             | Beating | Neurite                                                                             |
|------------|-----------------------------------------------------------------------------------|-----------------------------------------------------------------------------------|-----------------------------------------------------------------------------------|---------|-------------------------------------------------------------------------------------|
| 1 $\mu$ M  | 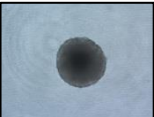 |  |  | +       |  |
| 10 $\mu$ M |  |  |  | +       |                                                                                     |
| 50 $\mu$ M |  |  |  | -       |                                                                                     |

## GEFITINIB

|            | Day 4                                                                              | Day 6                                                                              | Day 8                                                                              | Beating | Neurite                                                                              |
|------------|------------------------------------------------------------------------------------|------------------------------------------------------------------------------------|------------------------------------------------------------------------------------|---------|--------------------------------------------------------------------------------------|
| 1 $\mu$ M  | 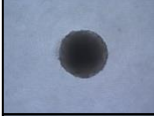  |   |   | +       |  |
| 10 $\mu$ M |   |   |   | -       |                                                                                      |
| 50 $\mu$ M |  |  |  | -       |                                                                                      |

## LOMUSTINE

|            | Day 4                                                                               | Day 6                                                                               | Day 8                                                                               | Beating | Neurite                                                                               |
|------------|-------------------------------------------------------------------------------------|-------------------------------------------------------------------------------------|-------------------------------------------------------------------------------------|---------|---------------------------------------------------------------------------------------|
| 1 $\mu$ M  | 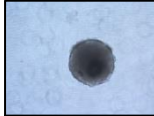 |  |  | +       |  |
| 10 $\mu$ M |  |  |  | +       |                                                                                       |
| 50 $\mu$ M |  |  |  | -       |                                                                                       |

## TAMOXIFEN

|            | Day 4                                                                             | Day 6                                                                             | Day 8                                                                             | Beating | Neurite                                                                             |
|------------|-----------------------------------------------------------------------------------|-----------------------------------------------------------------------------------|-----------------------------------------------------------------------------------|---------|-------------------------------------------------------------------------------------|
| 1 $\mu$ M  | 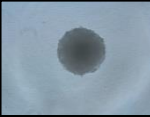 |  |  | +       |  |
| 10 $\mu$ M |  |  |  | -       |                                                                                     |
| 50 $\mu$ M |  |  |  | -       |                                                                                     |

## SORAFENIB

|            | Day 4                                                                              | Day 6                                                                              | Day 8                                                                              | Beating | Neurite                                                                              |
|------------|------------------------------------------------------------------------------------|------------------------------------------------------------------------------------|------------------------------------------------------------------------------------|---------|--------------------------------------------------------------------------------------|
| 1 $\mu$ M  | 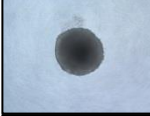  |   |   | -       |  |
| 10 $\mu$ M |   |   |   | -       |                                                                                      |
| 50 $\mu$ M |  |  |  | -       |                                                                                      |

## TRIMETREXATE

|            | Day 4                                                                               | Day 6                                                                               | Day 8                                                                               | Beating | Neurite                                                                               |
|------------|-------------------------------------------------------------------------------------|-------------------------------------------------------------------------------------|-------------------------------------------------------------------------------------|---------|---------------------------------------------------------------------------------------|
| 1 $\mu$ M  | 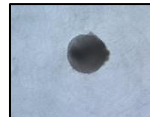 |  |  | -       |  |
| 10 $\mu$ M |  |  |  | -       |                                                                                       |
| 50 $\mu$ M |  |  |  | -       |                                                                                       |



## ERLOTINIB

|            | Day 4                                                                             | Day 6                                                                             | Day 8                                                                             | Beating | Neurite                                                                             |
|------------|-----------------------------------------------------------------------------------|-----------------------------------------------------------------------------------|-----------------------------------------------------------------------------------|---------|-------------------------------------------------------------------------------------|
| 1 $\mu$ M  | 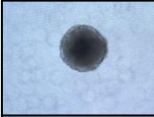 |  |  | +       |  |
| 10 $\mu$ M |  |  |  | -       |  |
| 50 $\mu$ M |  |  |  | -       |  |

## LORAZEPAM

|            | Day 4                                                                              | Day 6                                                                              | Day 8                                                                              | Beating | Neurite                                                                              |
|------------|------------------------------------------------------------------------------------|------------------------------------------------------------------------------------|------------------------------------------------------------------------------------|---------|--------------------------------------------------------------------------------------|
| 1 $\mu$ M  | 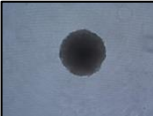  |   |   | +       |   |
| 10 $\mu$ M |   |   |   | +       |   |
| 50 $\mu$ M |  |  |  | -       |  |

## CLORAZEPATE

|            | Day 4                                                                               | Day 6                                                                               | Day 8                                                                               | Beating | Neurite                                                                               |
|------------|-------------------------------------------------------------------------------------|-------------------------------------------------------------------------------------|-------------------------------------------------------------------------------------|---------|---------------------------------------------------------------------------------------|
| 1 $\mu$ M  | 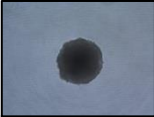 |  |  | +       |  |
| 10 $\mu$ M |  |  |  | +       |  |
| 50 $\mu$ M |  |  |  | -       |  |

## CAPECITABINE

|            | Day 4 | Day 6 | Day 8 | Beating | Neurite |
|------------|-------|-------|-------|---------|---------|
| 1 $\mu$ M  |       |       |       | +       |         |
| 10 $\mu$ M |       |       |       | -       |         |
| 50 $\mu$ M |       |       |       | -       |         |

## LAPATINIB

|            | Day 4 | Day 6 | Day 8 | Beating | Neurite |
|------------|-------|-------|-------|---------|---------|
| 1 $\mu$ M  |       |       |       | +       |         |
| 10 $\mu$ M |       |       |       | +       |         |
| 50 $\mu$ M |       |       |       | -       |         |

## PEMETREXED

|            | Day 4 | Day 6 | Day 8 | Beating | Neurite |
|------------|-------|-------|-------|---------|---------|
| 1 $\mu$ M  |       |       |       | -       |         |
| 10 $\mu$ M |       |       |       | -       |         |
| 50 $\mu$ M |       |       |       | -       |         |

## AZATHIOPRINE

|            | Day 4 | Day 6 | Day 8 | Beating | Neurite |
|------------|-------|-------|-------|---------|---------|
| 1 $\mu$ M  |       |       |       | +       |         |
| 10 $\mu$ M |       |       |       | -       |         |
| 50 $\mu$ M |       |       |       | -       |         |

## MERCAPTOPURINE

|            | Day 4 | Day 6 | Day 8 | Beating | Neurite |
|------------|-------|-------|-------|---------|---------|
| 1 $\mu$ M  |       |       |       | -       |         |
| 10 $\mu$ M |       |       |       | -       |         |
| 50 $\mu$ M |       |       |       | -       |         |

## AZACITIDINE

|            | Day 4 | Day 6 | Day 8 | Beating | Neurite |
|------------|-------|-------|-------|---------|---------|
| 1 $\mu$ M  |       |       |       | -       |         |
| 10 $\mu$ M |       |       |       | -       |         |
| 50 $\mu$ M |       |       |       | -       |         |

# Class IV

## EPIRUBICIN

|            | Day 4 | Day 6 | Day 8 | Beating | Neurite |
|------------|-------|-------|-------|---------|---------|
| 1 $\mu$ M  |       |       |       | -       | *       |
| 10 $\mu$ M |       |       |       | -       | *       |
| 50 $\mu$ M |       |       |       | -       | *       |

## FLUOROURACIL

|            | Day 4 | Day 6 | Day 8 | Beating | Neurite |
|------------|-------|-------|-------|---------|---------|
| 1 $\mu$ M  |       |       |       | -       | *       |
| 10 $\mu$ M |       |       |       | -       | *       |
| 50 $\mu$ M |       |       |       | -       | *       |

## ESTRAMUSTINE

|            | Day 4 | Day 6 | Day 8 | Beating | Neurite |
|------------|-------|-------|-------|---------|---------|
| 1 $\mu$ M  |       |       |       | +       |         |
| 10 $\mu$ M |       |       |       | +       |         |
| 50 $\mu$ M |       |       |       | -       | *       |

### PLICAMYCIN

|            | Day 4 | Day 6 | Day 8 | Beating | Neurite |
|------------|-------|-------|-------|---------|---------|
| 1 $\mu$ M  |       |       |       | -       | *       |
| 10 $\mu$ M |       |       |       | -       | *       |
| 50 $\mu$ M |       |       |       | -       | *       |

### GEMCITABINE

|            | Day 4 | Day 6 | Day 8 | Beating | Neurite |
|------------|-------|-------|-------|---------|---------|
| 1 $\mu$ M  |       |       |       | -       | *       |
| 10 $\mu$ M |       |       |       | -       | *       |
| 50 $\mu$ M |       |       |       | -       | *       |

### DIETHYLSTILBESTROL

|            | Day 4 | Day 6 | Day 8 | Beating | Neurite |
|------------|-------|-------|-------|---------|---------|
| 1 $\mu$ M  |       |       |       | +       |         |
| 10 $\mu$ M |       |       |       | -       |         |
| 50 $\mu$ M |       |       |       | -       |         |

### ZOLEDRONIC ACID

|            | Day 4 | Day 6 | Day 8 | Beating | Neurite |
|------------|-------|-------|-------|---------|---------|
| 1 $\mu$ M  |       |       |       | +       |         |
| 10 $\mu$ M |       |       |       | -       |         |
| 50 $\mu$ M |       |       |       | -       | *       |

### IMATINIB

|            | Day 4 | Day 6 | Day 8 | Beating | Neurite |
|------------|-------|-------|-------|---------|---------|
| 1 $\mu$ M  |       |       |       | +       |         |
| 10 $\mu$ M |       |       |       | -       |         |
| 50 $\mu$ M |       |       |       | -       | *       |

### TIOGUANINE

|            | Day 4 | Day 6 | Day 8 | Beating | Neurite |
|------------|-------|-------|-------|---------|---------|
| 1 $\mu$ M  |       |       |       | -       |         |
| 10 $\mu$ M |       |       |       | -       | *       |
| 50 $\mu$ M |       |       |       | -       | *       |

### VINOURELBINE

|            | Day 4 | Day 6 | Day 8 | Beating | Neurite |
|------------|-------|-------|-------|---------|---------|
| 1 $\mu$ M  |       |       |       | -       | *       |
| 10 $\mu$ M |       |       |       | -       | *       |
| 50 $\mu$ M |       |       |       | -       | *       |

### VORINOSTAT

|            | Day 4 | Day 6 | Day 8 | Beating | Neurite |
|------------|-------|-------|-------|---------|---------|
| 1 $\mu$ M  |       |       |       | -       |         |
| 10 $\mu$ M |       |       |       | -       | *       |
| 50 $\mu$ M |       |       |       | -       | *       |

### DOCETAXEL

|            | Day 4 | Day 6 | Day 8 | Beating | Neurite |
|------------|-------|-------|-------|---------|---------|
| 1 $\mu$ M  |       |       |       | -       | *       |
| 10 $\mu$ M |       |       |       | -       | *       |
| 50 $\mu$ M |       |       |       | -       | *       |

## IRINOTECAN

|            | Day 4 | Day 6 | Day 8 | Beating | Neurite |
|------------|-------|-------|-------|---------|---------|
| 1 $\mu$ M  |       |       |       | +       |         |
| 10 $\mu$ M |       |       |       | -       |         |
| 50 $\mu$ M |       |       |       | -       | *       |

## CLADRIBINE

|            | Day 4 | Day 6 | Day 8 | Beating | Neurite |
|------------|-------|-------|-------|---------|---------|
| 1 $\mu$ M  |       |       |       | -       |         |
| 10 $\mu$ M |       |       |       | -       | *       |
| 50 $\mu$ M |       |       |       | -       | *       |

## IDARUBICIN

|            | Day 4 | Day 6 | Day 8 | Beating | Neurite |
|------------|-------|-------|-------|---------|---------|
| 1 $\mu$ M  |       |       |       | -       | *       |
| 10 $\mu$ M |       |       |       | -       | *       |
| 50 $\mu$ M |       |       |       | -       | *       |



## IXABEPILONE

|            | Day 4 | Day 6 | Day 8 | Beating | Neurite |
|------------|-------|-------|-------|---------|---------|
| 1 $\mu$ M  |       |       |       | -       | *       |
| 10 $\mu$ M |       |       |       | -       | *       |
| 50 $\mu$ M |       |       |       | -       | *       |

## SUNITINIB

|            | Day 4 | Day 6 | Day 8 | Beating | Neurite |
|------------|-------|-------|-------|---------|---------|
| 1 $\mu$ M  |       |       |       | +       |         |
| 10 $\mu$ M |       |       |       | -       | *       |
| 50 $\mu$ M |       |       |       | -       | *       |

## LYNESTRENOL

|            | Day 4 | Day 6 | Day 8 | Beating | Neurite |
|------------|-------|-------|-------|---------|---------|
| 1 $\mu$ M  |       |       |       | +       |         |
| 10 $\mu$ M |       |       |       | +       |         |
| 50 $\mu$ M |       |       |       | -       | *       |

## TEMSIROLIMUS

|            | Day 4                                                                             | Day 6                                                                             | Day 8                                                                             | Beating | Neurite                                                                               |
|------------|-----------------------------------------------------------------------------------|-----------------------------------------------------------------------------------|-----------------------------------------------------------------------------------|---------|---------------------------------------------------------------------------------------|
| 1 $\mu$ M  | 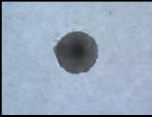 |  |  | -       |    |
| 10 $\mu$ M |  |  |  | -       |    |
| 50 $\mu$ M |  |  |  | -       | *  |

## DECITABINE

|            | Day 4                                                                              | Day 6                                                                              | Day 8                                                                              | Beating | Neurite                                                                                |
|------------|------------------------------------------------------------------------------------|------------------------------------------------------------------------------------|------------------------------------------------------------------------------------|---------|----------------------------------------------------------------------------------------|
| 1 $\mu$ M  | 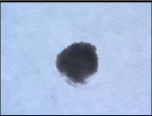  |   |   | -       |     |
| 10 $\mu$ M |   |   |   | -       |     |
| 50 $\mu$ M |  |  |  | -       | *  |

## TOREMIFENE

|            | Day 4                                                                               | Day 6                                                                               | Day 8                                                                               | Beating | Neurite                                                                                 |
|------------|-------------------------------------------------------------------------------------|-------------------------------------------------------------------------------------|-------------------------------------------------------------------------------------|---------|-----------------------------------------------------------------------------------------|
| 1 $\mu$ M  | 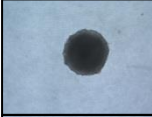 |  |  | -       |    |
| 10 $\mu$ M |  |  |  | -       |    |
| 50 $\mu$ M |  |  |  | -       | *  |

## DASATINIB

|            | Day 4 | Day 6 | Day 8 | Beating | Neurite |
|------------|-------|-------|-------|---------|---------|
| 1 $\mu$ M  |       |       |       | -       |         |
| 10 $\mu$ M |       |       |       | -       |         |
| 50 $\mu$ M |       |       |       | -       |         |

## EVEROLIMUS

|            | Day 4 | Day 6 | Day 8 | Beating | Neurite |
|------------|-------|-------|-------|---------|---------|
| 1 $\mu$ M  |       |       |       | -       |         |
| 10 $\mu$ M |       |       |       | -       |         |
| 50 $\mu$ M |       |       |       | -       |         |

## BORTEZOMIB

|            | Day 4 | Day 6 | Day 8 | Beating | Neurite |
|------------|-------|-------|-------|---------|---------|
| 1 $\mu$ M  |       |       |       | -       | *       |
| 10 $\mu$ M |       |       |       | -       | *       |
| 50 $\mu$ M |       |       |       | -       | *       |

## OXALIPLATIN

|            | Day 4                                                                             | Day 6                                                                             | Day 8                                                                             | Beating | Neurite                                                                             |
|------------|-----------------------------------------------------------------------------------|-----------------------------------------------------------------------------------|-----------------------------------------------------------------------------------|---------|-------------------------------------------------------------------------------------|
| 1 $\mu$ M  | 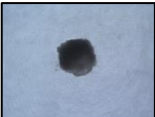 |  |  | +       |  |
| 10 $\mu$ M |  |  |  | -       | *                                                                                   |
| 50 $\mu$ M |  |  |  | -       | *                                                                                   |

## MELPHALAN

|            | Day 4                                                                              | Day 6                                                                              | Day 8                                                                              | Beating | Neurite                                                                             |
|------------|------------------------------------------------------------------------------------|------------------------------------------------------------------------------------|------------------------------------------------------------------------------------|---------|-------------------------------------------------------------------------------------|
| 1 $\mu$ M  | 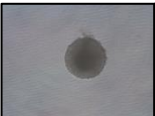  |   |   | +       |  |
| 10 $\mu$ M |   |   |   | -       |  |
| 50 $\mu$ M |  |  |  | -       | *                                                                                   |

## VINCRIStINE

|            | Day 4                                                                               | Day 6                                                                               | Day 8                                                                               | Beating | Neurite |
|------------|-------------------------------------------------------------------------------------|-------------------------------------------------------------------------------------|-------------------------------------------------------------------------------------|---------|---------|
| 1 $\mu$ M  | 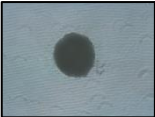 |  |  | -       | *       |
| 10 $\mu$ M |  |  |  | -       | *       |
| 50 $\mu$ M |  |  |  | -       | *       |

## VINBLASTINE

|            | Day 4                                                                             | Day 6                                                                             | Day 8                                                                             | Beating | Neurite |
|------------|-----------------------------------------------------------------------------------|-----------------------------------------------------------------------------------|-----------------------------------------------------------------------------------|---------|---------|
| 1 $\mu$ M  | 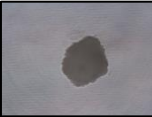 |  |  | -       | *       |
| 10 $\mu$ M |  |  |  | -       | *       |
| 50 $\mu$ M |  |  |  | -       | *       |

## TENIPOSIDE

|            | Day 4                                                                              | Day 6                                                                              | Day 8                                                                              | Beating | Neurite |
|------------|------------------------------------------------------------------------------------|------------------------------------------------------------------------------------|------------------------------------------------------------------------------------|---------|---------|
| 1 $\mu$ M  | 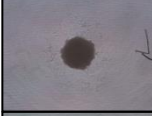  |   |   | -       | *       |
| 10 $\mu$ M |   |   |   | -       | *       |
| 50 $\mu$ M |  |  |  | -       | *       |

## TOPOTECAN

|            | Day 4                                                                               | Day 6                                                                               | Day 8                                                                               | Beating | Neurite                                                                               |
|------------|-------------------------------------------------------------------------------------|-------------------------------------------------------------------------------------|-------------------------------------------------------------------------------------|---------|---------------------------------------------------------------------------------------|
| 1 $\mu$ M  | 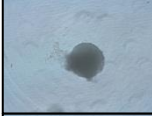 |  |  | -       |  |
| 10 $\mu$ M |  |  |  | -       | *                                                                                     |
| 50 $\mu$ M |  |  |  | -       | *                                                                                     |

### CHLORAMBUCIL

|            | Day 4                                                                             | Day 6                                                                             | Day 8                                                                             | Beating | Neurite                                                                             |
|------------|-----------------------------------------------------------------------------------|-----------------------------------------------------------------------------------|-----------------------------------------------------------------------------------|---------|-------------------------------------------------------------------------------------|
| 1 $\mu$ M  | 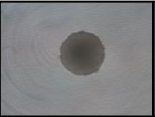 |  |  | +       |  |
| 10 $\mu$ M |  |  |  | +       |                                                                                     |
| 50 $\mu$ M |  |  |  | -       |                                                                                     |

### COLCHICINE

|            | Day 4                                                                              | Day 6                                                                              | Day 8                                                                              | Beating | Neurite |
|------------|------------------------------------------------------------------------------------|------------------------------------------------------------------------------------|------------------------------------------------------------------------------------|---------|---------|
| 1 $\mu$ M  |   |   |   | -       | *       |
| 10 $\mu$ M |   |   |   | -       | *       |
| 50 $\mu$ M |  |  |  | -       | *       |

### CYTARABINE

|            | Day 4                                                                               | Day 6                                                                               | Day 8                                                                               | Beating | Neurite |
|------------|-------------------------------------------------------------------------------------|-------------------------------------------------------------------------------------|-------------------------------------------------------------------------------------|---------|---------|
| 1 $\mu$ M  | 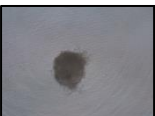 |  |  | -       | *       |
| 10 $\mu$ M |  |  |  | -       | *       |
| 50 $\mu$ M |  |  |  | -       | *       |

## DAUNORUBICIN

|            | Day 4                                                                             | Day 6                                                                             | Day 8                                                                             | Beating | Neurite |
|------------|-----------------------------------------------------------------------------------|-----------------------------------------------------------------------------------|-----------------------------------------------------------------------------------|---------|---------|
| 1 $\mu$ M  | 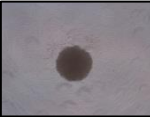 |  |  | -       | *       |
| 10 $\mu$ M |  |  |  | -       | *       |
| 50 $\mu$ M |  |  |  | -       | *       |

## THIOGUANINE

|            | Day 4                                                                              | Day 6                                                                              | Day 8                                                                              | Beating | Neurite |
|------------|------------------------------------------------------------------------------------|------------------------------------------------------------------------------------|------------------------------------------------------------------------------------|---------|---------|
| 1 $\mu$ M  | 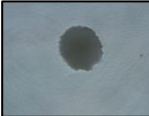  |   |   | -       | *       |
| 10 $\mu$ M |   |   |   | -       | *       |
| 50 $\mu$ M |  |  |  | -       | *       |

## ETOPOSIDE

|            | Day 4                                                                               | Day 6                                                                               | Day 8                                                                               | Beating | Neurite                                                                               |
|------------|-------------------------------------------------------------------------------------|-------------------------------------------------------------------------------------|-------------------------------------------------------------------------------------|---------|---------------------------------------------------------------------------------------|
| 1 $\mu$ M  | 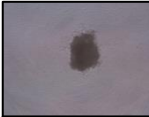 |  |  | -       |  |
| 10 $\mu$ M |  |  |  | -       | *                                                                                     |
| 50 $\mu$ M |  |  |  | -       | *                                                                                     |

## CARBOPLATIN

|            | Day 4                                                                             | Day 6                                                                             | Day 8                                                                             | Beating | Neurite                                                                            |
|------------|-----------------------------------------------------------------------------------|-----------------------------------------------------------------------------------|-----------------------------------------------------------------------------------|---------|------------------------------------------------------------------------------------|
| 1 $\mu$ M  | 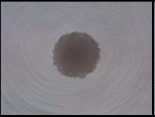 |  |  | +       |  |
| 10 $\mu$ M |  |  |  | -       | *                                                                                  |
| 50 $\mu$ M |  |  |  | -       | *                                                                                  |

## FLOXURIDINE

|            | Day 4                                                                              | Day 6                                                                              | Day 8                                                                              | Beating | Neurite                                                                            |
|------------|------------------------------------------------------------------------------------|------------------------------------------------------------------------------------|------------------------------------------------------------------------------------|---------|------------------------------------------------------------------------------------|
| 1 $\mu$ M  | 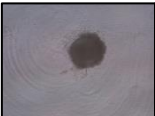  |   |   | -       |  |
| 10 $\mu$ M |   |   |   | -       | *                                                                                  |
| 50 $\mu$ M |  |  |  | -       | *                                                                                  |

## MITOXANTRONE

|            | Day 4                                                                               | Day 6                                                                               | Day 8                                                                               | Beating | Neurite |
|------------|-------------------------------------------------------------------------------------|-------------------------------------------------------------------------------------|-------------------------------------------------------------------------------------|---------|---------|
| 1 $\mu$ M  | 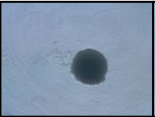 |  |  | -       | *       |
| 10 $\mu$ M |  |  |  | -       | *       |
| 50 $\mu$ M |  |  |  | -       | *       |



### THIOTEPA

|            | Day 4                                                                             | Day 6                                                                             | Day 8                                                                             | Beating | Neurite                                                                             |
|------------|-----------------------------------------------------------------------------------|-----------------------------------------------------------------------------------|-----------------------------------------------------------------------------------|---------|-------------------------------------------------------------------------------------|
| 1 $\mu$ M  | 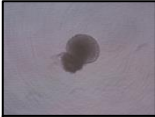 |  |  | -       |  |
| 10 $\mu$ M |  |  |  | -       | *                                                                                   |
| 50 $\mu$ M |  |  |  | -       | *                                                                                   |

### PACLITAXEL

|            | Day 4                                                                              | Day 6                                                                              | Day 8                                                                              | Beating | Neurite |
|------------|------------------------------------------------------------------------------------|------------------------------------------------------------------------------------|------------------------------------------------------------------------------------|---------|---------|
| 1 $\mu$ M  | 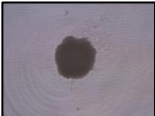  |   |   | -       | *       |
| 10 $\mu$ M |   |   |   | -       | *       |
| 50 $\mu$ M |  |  |  | -       | *       |

### DOXORUBICIN

|            | Day 4                                                                               | Day 6                                                                               | Day 8                                                                               | Beating | Neurite |
|------------|-------------------------------------------------------------------------------------|-------------------------------------------------------------------------------------|-------------------------------------------------------------------------------------|---------|---------|
| 1 $\mu$ M  | 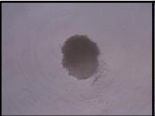 |  |  | -       | *       |
| 10 $\mu$ M |  |  |  | -       | *       |
| 50 $\mu$ M |  |  |  | -       | *       |

# CLOFARABINE

|            | Day 4                                                                             | Day 6                                                                             | Day 8                                                                             | Beating | Neurite                                                                             |
|------------|-----------------------------------------------------------------------------------|-----------------------------------------------------------------------------------|-----------------------------------------------------------------------------------|---------|-------------------------------------------------------------------------------------|
| 1 $\mu$ M  | 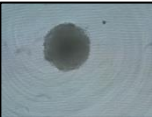 |  |  | -       |  |
| 10 $\mu$ M |  |  |  | -       | *                                                                                   |
| 50 $\mu$ M |  |  |  | -       | *                                                                                   |
