# Supplementary material for: A Modified Murine Embryonic Stem Cell Test for Evaluating the Teratogenic Effects of Drugs on Early Embryogenesis
Source: PLoS One. 2015 Dec 18;10(12):e0145286. doi: 10.1371/journal.pone.0145286 (PMC4686177; doi:10.1371/journal.pone.0145286)
Supplement: S2 Table — (XLSX) [file pone.0145286.s004.xlsx]

## Sheet: Sheet1
Table S2. Primer Sequences
gapdh	F	GTCGGTGTGAACGGATTTGGC
	R	GTTGAGGTCAATGAAGGGGTCG
brachyury T	F	CCCATTTGCTAAAGCCTTCCT
	R	GTCCCCCGGTTCCTCCATTA
gata6	F	CAAAAGCTTGCTCCGGTAAC
	R	TGAGGTGGTCGCTTGTGTAG
bmp2	F	TGTGGAGACTCTCTCAATGGAC
	R	GGGAAGCAGCAACACTAGAA
afp	F	TAACCTGGTGAAGCAAAAGC
	R	TTAAGCCAAAAGGCTCACAC
mhc	F	ACAACCCCTACGATTATGCGT
	R	ACGTCAAAGGCACTATCCGTG
sox2	F	CCCACCTACAGCATGTCCTA
	R	GTGGGAGGAAGAGGTAACCA
nestin	F	TGCAGGCCACTGAAAAGTTC
	R	TCTTGAGGTGTGCCAGTTGC
sox1	F	GCAGCGTTTCCGTGACTTTAT
	R	GGCAGAACCACAGGAAAGAAA
wnt3	F	CACACACGAGGACGGAGAA
	R	CCAGTCGCACAATCTACCCC
map2	F	GCCACAGTGGAGGAAGATTT
	R	ACCAGGCTTACTTGGCATCT
GABA receptor α3 subunit	F	GCCGTCTGTTATCGGTTTGTATTT
	R	TTCTTCATCTCCAGGGCCTCT
GABA receptor β1 subunit	F	TATTCTCCTCAGCACCCTGGAA
	R	CGAGTACATGGTGGCCTTGG
GABA receptor β3 subunit	F	CTTTGCGGGAGGAAGGCTTT
	R	GGGGTCGTTTACGCTCTGAG
GABA receptor γ1 subunit	F	GTAAAAGCGAACCCGATGGG
	R	CGACACAGTTTCCCAGATGC
GABA receptor γ2 subunit	F	ACTTCTGGTGACTATGTGGTGAT
	R	GGCAGGAACAGCATCCTTATTG
GABA receptor γ3 subunit	F	GGATTCCAGACACCATCTTTCGA
	R	TTCCCATCATTCCAGATTCTGAGG
brachyury T probe	F	TTTGAATTCCAGTTAATCAGAGTCCTTTG
	R	TTTAAGCTTACCAGGTGCTATATATTGCC
sox2 probe	F	TTTGAATTCAAACCGTGATGCCTACTA
	R	TTTAAGCTTATCCGAATAAACTCCTTCCTTG
